# Supplementary material for: A comprehensive characterization of agronomic and end-use quality phenotypes across a quinoa world core collection
Source: Frontiers journal article supplement (doi:10.3389/fpls.2023.1101547), 2023-02-16
Supplement: Presentation_1.zip [file Presentation_1.zip]

## Sheet: metaData
Abbreviation	Full Description
collection	VT, Variety Trial accessions; WCC, World Core Collection Accessions
ATC	Agglomerative hierachical clustering using subset of traits (see principal component analysis for list of traits)
3TC	K-means clustering using yield, days to harvest, height at harvest
DTA	Days to Anthesis
Anth	Anthesis (days)
FSR	FruitSet/Ripening (days)
DTH	Days to Harvest
Ht_1	Plant Height-5wk After Sowing (cm)
Ht_2	Plant Height-6wk After Sowing (cm)
Ht_Harvest	Plant Height-Harvest (cm)
Infl_L	Inflorescence Length (cm)
Infl_W	Inflorescence Width (cm)
Infl_Area	Inflorescence Area (cm)
Ash	Ash Content (%)𝝍
CF	Crude Fat Content (%)𝝍
CP	Crude Protein Content (%)𝝍
TAA	Total Amino Acid Content (mg g-1 protein)𝝍
His	Histidine Content (mg g-1 protein)𝝍
Ile	Isoleucine Content (mg g-1 protein)𝝍
Leu	Leucine Content (mg g-1 protein)𝝍
Lys	Lysine Content (mg g-1 protein)𝝍
SAA	SAA Content (mg g-1 protein)𝝍
AAA	AAA Content (mg g-1 protein)𝝍
Thr	Threonine Content (mg g-1 protein)𝝍
Trp	Tryptophan Content (mg g-1 protein)𝝍
Val	Valine Content (mg g-1 protein)𝝍
CP Yield	Crude Protein Yield (g plant-1)
Yield	Yield (g plant-1)
TSW	Thousand Seed Weight (g)
Seeds	Total Seeds (seeds plant-1)
Area	Seed Area (mm2)
Eccen	Seed Eccentricity
sumRGB	Total Red, Green, Blue

## Sheet: TableS3_BLUEs
Supplementary Table S4. Best linear unbiased estimates (BLUEs) provided for each accession, in addition to the collection and cluster identity according to all trait or three trait (yield, days to harvest, height at harvest). Rows are sorted by collection and then accession in alphabetical order. Trait abbreviations are provided on sheet one, titled ‘metaData’
Accession	collection	ATC	3TC	DTA	Anth	FSR	DTH	Ht_1	Ht_2	Ht_Harvest	Infl_L	Infl_W	Infl_Area	Ash	CF	CP	TAA	His	Ile	Leu	Lys	SAA	AAA	Thr	Trp	Val	CP Yield	Yield	TSW	Seeds	Area	Eccen	sumRGB
11WAQ-102.5	VT	1	4	41.7725	12.71	18.875	87.125	50.8708	75.9118	135.375	23.5	11	246.625	2.28289	3.07472	12.1603	841.582	27.3082	38.9006	60.0697	60.2721	37.7669	63.2508	33.7501	10.1666	45.2149	1.18509	9.72937	3.08731	3154.53	2.96169	0.345967	311.056
11WAQ-102.52	VT	1	4	44.8156	11.335	19.25	88.25	47.0611	67.7191	114.5	20.125	10.875	195.5	2.41496	2.99647	12.008	829.03	26.5476	38.2111	59.7409	59.9798	37.6664	62.4289	33.4596	10.3794	44.9306	1.24866	10.393	3.44074	3032.77	3.05938	0.340446	313.94
11WAQ-102.8	VT	1	4	41.3725	12.11	19	85.5	51.5295	74.4716	119.25	26.125	7.375	190	2.39106	3.01733	11.9064	831.629	26.552	38.1887	59.4322	59.7231	37.5564	62.3094	33.4562	10.1361	44.3091	1.28811	10.8164	3.10417	3495.73	2.81021	0.341146	320.231
11WAQ-104.2	VT	1	4	43.867	10.9536	21.75	88.5	49.5	72.25	110.5	27.625	8.125	216.625	2.46636	2.9235	11.6765	839.6	26.6893	39.2473	60.1068	59.9214	38.5346	64.8694	34.102	10.61	45.9991	1.20214	10.2784	2.89099	3561.93	2.64648	0.351905	361.922
11WAQ-104.21	VT	1	4	46.3156	9.83497	20.375	89.125	43.1143	64.9939	116	16.75	13	204	2.28358	3.2352	12.2419	840.729	27.1834	38.8486	59.7296	59.5662	37.8561	63.0699	33.5911	10.4328	44.9233	1.2388	10.1245	3.00499	3389.57	2.89142	0.349998	321.623
11WAQ-104.60	VT	1	4	44.5725	11.31	18.875	86.375	43.7457	63.8892	110	23.25	6.375	147.25	2.47137	2.86745	11.8221	837.307	26.4509	38.2274	59.5841	59.0919	38.1792	62.7267	33.4443	10.2185	44.7838	1.2978	10.7279	3.16089	3406.46	2.75335	0.34076	352.763
11WAQ-104.88	VT	1	4	42.94	11.935	18.9075	87.75	45.75	68.75	112.5	20.25	9.875	189.25	2.43441	3.30819	12.1493	830.113	26.426	38.727	58.4838	59.0942	37.9447	62.817	33.1059	10.3859	43.4664	1.2066	9.89912	3.46692	2895.73	3.04795	0.341944	347.228
11WAQ-106.49	VT	1	4	42.7098	14.9343	15.875	87	47.125	63.75	98.5	25.25	10.75	272.375	2.81141	3.14194	11.9514	841.343	27.126	38.0408	59.3538	56.4496	35.1345	60.6724	32.3734	9.20366	44.6203	1.05013	8.90412	2.9263	3140.09	2.7107	0.325722	236.683
11WAQ-106.85	VT	1	4	45.149	8.1683	19.75	87.125	45	65.375	105	26.5	8.375	215.875	2.39784	3.56095	13.0467	841.314	27.5139	39.049	60.4172	57.071	37.0884	63.9638	33.1703	9.85023	45.4054	1.09803	8.42287	2.80673	2999.42	2.65129	0.348136	335.844
11WAQ-107.22	VT	1	4	43.1219	10.8557	20	87.375	47.5	65.875	117.125	25.625	8.125	208.25	2.57342	3.57694	13.2159	824.779	26.7297	38.6732	59.2442	58.5776	36.837	62.7739	32.6363	9.86807	44.4648	1.03259	8.00862	3.30893	2445.35	2.95515	0.385237	337.73
11WAQ-107.3	VT	1	4	40.0629	9.30007	25	88.75	55.625	75.25	117.875	24	6.625	159.125	2.46163	4.40442	12.5047	846.014	27.6181	38.6661	60.5273	56.6854	37.0934	62.3715	33.2267	9.26221	45.0598	0.939223	7.16787	3.72579	1928.39	3.06603	0.352525	266.561
11WAQ-107.65	VT	1	4	40.576	10.8271	21.5	86.75	54.25	79.125	121.25	26.25	9.125	240.375	2.55083	3.81221	12.1071	845.397	27.1326	38.111	59.366	57.2365	37.024	61.8979	33.0855	9.37223	44.1592	1.08261	8.99675	3.82355	2378.6	3.12116	0.343136	263.975
11WAQ-107.67	VT	1	4	42.267	12.1536	20.375	87.125	43.875	62.375	99.125	25.875	7.375	187.75	2.53594	3.69113	12.1912	850.219	27.2327	39.5429	60.8693	57.6397	37.5095	63.9524	33.1827	10.1052	45.6668	0.967566	7.96487	3.53861	2249.06	3.177	0.34274	332.542
11WAQ-107.68	VT	1	4	41.576	10.8271	21.125	85.75	48.625	69	113.125	23.875	8.375	199.5	2.50234	3.4005	12.1438	829.468	26.4048	38.7718	60.8101	58.1573	38.0512	63.4847	32.8564	9.80728	45.4403	0.970823	7.99225	3.85678	2069.86	3.12035	0.354506	334.532
11WAQ-107.7	VT	1	4	40.8005	9.66194	23	87.875	48.7809	69.2484	111.5	21.875	7.375	157.875	2.54941	2.8258	12.1011	836.197	26.8312	38.1865	60.5489	60.3979	36.6552	62.7324	33.3685	10.7344	45.9121	1.13718	9.40912	3.95974	2386.82	3.20912	0.364119	323.411
11WAQ-107.82	VT	1	4	42.0954	9.86234	19.6184	88.25	48.125	68.125	106	27.375	7.125	193	2.36977	3.20724	11.9865	860.122	27.9816	38.252	60.0938	58.5193	36.5212	62.5228	33.7028	9.94655	44.8565	1.09793	8.88237	3.38188	2675.31	2.92269	0.333396	249.847
11WAQ-107.84	VT	1	4	42.6037	9.69032	20.3226	87.625	49.875	73	121	24.625	6.875	167.75	2.42775	2.90832	12.2766	847.63	27.5924	39.3938	61.1754	57.8483	36.5452	62.974	33.4094	9.47744	46.0965	0.938348	8.35275	3.0569	2726.97	2.79461	0.327512	256.101
11WAQ-108.18	VT	1	4	43.649	11.5016	19.5	89.375	45	65.75	103.25	27	7	187.125	2.43162	2.96861	11.2585	838.714	26.5009	38.341	60.3271	60.174	39.0626	63.6843	33.7519	10.6142	45.6663	0.987038	8.74687	3.09594	2858.28	2.82425	0.350636	384.697
11WAQ-108.34	VT	1	4	45.0863	11.8048	18.875	88.5	46.25	67.875	119.125	29.375	8	233.375	2.43618	2.81245	11.4879	846.736	26.8788	39.4225	61.7892	60.717	38.444	64.1623	34.3411	10.5445	47.1023	1.20625	10.4469	3.07874	3406.95	2.76583	0.359666	343.175
11WAQ-108.42	VT	1	4	44.267	14.5536	17.875	91.375	46.75	68.875	112	22.5	6.75	151.625	2.45814	2.91502	11.8873	839.082	26.5883	38.4563	60.6277	58.0238	38.713	61.8401	32.5774	9.94825	45.1678	0.842487	7.10487	2.87735	2467.46	2.71653	0.360214	335.79
KASLAEA	VT	1	4	43.649	10.0016	19	87	44.8885	64.3178	105.5	21.375	9.25	183	2.56536	3.12644	11.8424	833.61	26.2074	38.0055	58.6257	59.1845	39.1749	63.3917	33.1177	10.4833	44.5206	1.05203	8.91887	3.32241	2676.64	2.96557	0.332655	404.164
PUNO	VT	1	4	45.0863	13.9477	14.625	87.25	46.875	68.75	112.875	28	7.5	210.125	2.37956	3.9972	13.4783	832.904	27.3783	39.4026	60.0183	55.6922	37.6289	64.3301	32.4305	9.9482	44.8519	1.14413	8.46487	2.52559	3411.73	2.44825	0.358682	391.222
QQ74	VT	1	4	41.34	11.535	19.875	85.5	53.375	75.5	110.375	24.875	9.25	234	2.44434	3.09115	11.7033	835.925	26.6575	38.658	59.3878	60.2728	36.9541	62.4256	33.9612	10.3382	44.6098	1.18488	10.1311	3.256	3122.99	2.86679	0.358245	317.073
QUF9P39-64	VT	1	4	45.149	15.5445	18.25	91.125	42.125	59.5	117.375	22.25	5.875	129.75	2.71128	3.12895	14.112	815.646	26.7697	36.6363	58.7019	57.9661	36.588	60.3788	31.5807	10.085	43.9272	1.02275	7.22125	3.3145	2210.25	3.11211	0.339837	342.491
654	WCC	2	1	51.125	16	26.5	108.25	46.375	62.625	154.125	28.625	7.75	223	2.86904	4.21583	16.5909	787.005	26.7831	37.8173	57.7385	55.1552	35.6831	62.2394	29.6987	9.71737	43.3487	0.907814	5.443	3.36685	1657.13	3.04704	0.353557	300.512
03-21-072RM	WCC	-	-	-	-	-	-	-	-	-	-	-	-	-	-	-	-	-	-	-	-	-	-	-	-	-	-	-	-	-	-	-	-
Ames-13721	WCC	1	4	42.076	18.3271	17.5	89.75	44.875	59.875	101.5	21.5	7.125	152.625	2.69485	3.69783	13.2087	831.196	27.0176	38.4405	56.9419	58.7422	37.5971	63.3237	32.1368	10.6253	42.9131	0.946615	7.18587	3.20566	2263.64	3.24855	0.378414	379.597
Ames-13722	WCC	1	4	46.125	12.125	17.25	89.125	41.75	59	117.125	26.125	6.75	176.875	2.94967	3.47474	14.2478	811.288	26.7087	37.5379	58.8964	56.0162	35.232	60.474	31.0653	10.1828	43.9492	1.04103	7.27187	3.25228	2256.95	3.03788	0.429679	360.123
Ames-13723	WCC	1	4	44.6577	15.0905	17.75	91.375	38.875	53.75	109	23.25	18.125	397.5	2.50475	2.93518	11.9801	830.62	26.6897	37.7584	60.3432	58.6771	36.8204	62.3865	33.2811	10.6696	45.5167	1.04638	8.725	2.81972	3089.28	2.50779	0.34932	351.296
Ames-13725	WCC	2	2	64.625	14.625	20.625	114	46.25	66.75	174.625	28.375	9.375	229.5	2.77819	3.80552	14.9201	818.173	27.1449	38.4779	60.0929	56.3913	36.3428	62.313	31.4986	9.96397	45.0202	0.850289	5.65962	2.547	2226.97	2.56499	0.423878	337.656
Ames-13726	WCC	1	1	46.649	16.6683	18.5	95.125	39	57.375	128.875	30.125	6.375	191.75	2.42973	3.4671	13.821	820.058	27.2045	38.4181	59.3849	57.4127	37.1901	62.7551	31.9718	10.3489	44.7611	0.858578	6.14637	2.97873	2368.44	2.8076	0.3329	282.82
Ames-13727	WCC	1	4	45.8408	14.232	16.75	89.5	40.625	59.625	127	28.375	6.75	194.75	2.68241	3.3073	13.3209	840.593	27.6197	39.5367	60.0293	57.4434	36.346	64.5073	32.2727	10.0075	45.1849	1.35242	10.1777	3.51657	2892.9	2.87259	0.369627	352.842
Ames-13728	WCC	2	1	53.5745	13.3386	23.25	104.375	48.375	69.75	170.75	28.25	9	253	2.4001	4.35446	13.4771	833.89	27.6659	40.2341	62.5737	55.146	37.9244	66.7941	32.5442	10.2685	47.3314	0.966409	6.299	2.95494	2470.66	2.52238	0.379987	361.142
Ames-13729	WCC	1	4	52.6129	13.0537	15.125	93.875	39.5	54.375	129.75	21.25	15	283.375	2.60099	3.58342	12.1331	832.133	26.4323	38.921	59.7235	58.8192	38.019	62.8311	32.7169	10.3413	44.5315	0.930803	7.71162	3.2764	2349.19	2.83483	0.331112	380.505
Ames-13730	WCC	2	2	59	15	20.7042	106.625	46	66.75	176	33.25	8.125	232	2.85724	4.24944	14.4095	825.009	27.3932	39.5715	58.3775	55.8211	36.1728	63.812	31.1125	9.87454	44.0421	0.88633	5.499	2.95231	1865.07	2.96503	0.381532	370.322
Ames-13731	WCC	1	4	49.467	13.9536	17.5	93.375	40.25	57.5	123.125	24	9.75	232.125	2.72903	3.68103	12.9558	827.011	26.6666	38.3885	58.8593	56.761	36.7584	61.7645	32.0426	10.0443	44.116	1.19288	9.24062	3.38559	2734.19	2.92723	0.350148	356.339
Ames-13732	WCC	3	2	58.625	18.125	31.6535	119.125	34.125	51.125	157.875	30	7.625	224.875	2.52523	3.34966	14.2917	824.516	27.6413	39.1116	61.205	54.919	35.65	63.6392	32.2281	9.74821	45.9929	1.04763	6.49787	2.31401	2635.82	2.27738	0.411537	362.844
Ames-13733	WCC	1	1	54	18.375	18.3252	101.875	48.125	67	158.625	38.5	7.5	269.5	2.35584	3.24932	11.3051	867.977	27.6715	41.9904	64.3375	60.6145	40.2756	69.5033	33.9976	11.2148	48.8531	0.864671	7.69575	2.86122	2642.44	2.53038	0.349728	379.961
Ames-13734	WCC	2	1	53	15	18.125	97.375	47	64.25	152.5	31.625	7.375	234	2.89823	3.50806	13.7332	832.866	26.866	38.7787	58.7218	58.4666	36.587	61.6946	32.079	10.1651	43.921	1.00979	7.47175	3.04879	2419.69	2.71525	0.358396	376.202
Ames-13735	WCC	1	4	45.067	13.9536	17.625	89.5	46.25	62.75	116.75	25.25	5.625	141	2.65674	3.81698	13.4872	820.709	26.4677	38.915	58.8934	58.5647	37.2884	63.3096	32.4365	10.1926	44.6935	1.04738	8.091	3.42344	2316.79	2.95554	0.380213	325.958
Ames-13737	WCC	1	4	49.47	12.768	21.375	97.25	36.875	52.375	134.875	25.375	7.5	190.625	2.5111	3.65418	11.8998	844.899	27.0628	38.9462	59.3332	58.9017	38.0594	63.5246	33.1866	10.6404	44.537	1.01147	8.4325	2.92032	2877.61	2.88063	0.322634	386.547
Ames-13738	WCC	2	4	51.0414	12.4823	16	93.375	47.75	66.5	125.75	26.75	17.25	433	2.82894	4.13477	15.0701	813.688	27.2969	38.9519	58.1942	55.2282	35.6197	62.6122	30.8048	9.66577	43.5783	1.10603	7.38687	3.91114	1886.75	3.18015	0.368761	344.13
Ames-13740	WCC	1	4	49.649	14.335	17.25	94	44.125	64.375	137.5	34.875	6.625	227.375	2.42734	2.85708	12.2037	846.743	27.0199	38.9773	61.1879	56.8611	38.8094	64.2245	32.962	10.4336	46.1594	1.09527	9.01362	3.14145	2868.03	2.73129	0.369585	310.54
Ames-13742	WCC	2	1	51.0414	13.4823	20.375	99	52.25	77.25	163.25	36.375	12.5	454.375	2.8704	4.07695	13.8815	813.299	26.6646	38.5148	57.9168	56.3965	35.8868	62.0752	31.2191	9.85472	43.3995	1.21841	8.7685	3.37198	2609.16	3.02541	0.388348	376.521
Ames-13743	WCC	1	4	38.826	10.5771	21.5	86.25	45	64.875	105.5	24.125	7.125	173.375	2.64562	3.11699	12.6934	832.848	26.9854	38.4748	60.3138	58.4335	37.3047	63.426	33.0544	10.3075	45.497	1.12397	8.94037	3.26014	2765.01	2.84905	0.389361	366.146
Ames-13744	WCC	1	4	44.9823	13.0016	19	90.5	44.625	66	121	23.25	7.25	158.25	2.56553	3.28995	12.5568	830.488	26.6224	37.9011	58.705	58.5886	37.3655	62.1733	32.6892	10.4745	43.954	1.04004	8.2995	3.22389	2590.07	2.85376	0.370581	386.337
Ames-13745	WCC	1	4	44.7773	13.6797	17.625	89.5	46.375	66.625	123	26.625	5.75	155.875	2.63673	2.96098	11.919	834.806	26.6645	37.9199	59.5085	61.5034	37.6813	62.0159	33.1313	10.7932	44.4759	1.02072	8.513	3.26269	2609.61	2.98407	0.327639	380.508
Ames-13748	WCC	3	2	62	13.25	42.75	132.125	30.375	45.25	145	31.25	15.125	472.5	2.74187	2.93232	14.2647	832.715	27.4024	38.4611	58.4542	55.1524	36.2966	62.7003	31.441	10.1401	44.1928	0.755707	4.72625	2.85953	1721.98	2.43861	0.367957	288.401
Ames-13749	WCC	1	4	46.5148	15.5191	18.75	94	42.375	59.625	132.375	34	7.25	247.25	2.38441	3.59634	12.5601	847.553	27.5601	40.5729	59.7541	57.9116	38.3656	66.0866	32.7072	10.508	45.2235	0.954259	7.63875	3.06695	2485.99	2.83939	0.362777	349
Ames-13750	WCC	3	1	55.125	16.75	20.75	107.25	42.3332	57.746	152.25	37.25	13.75	501.75	2.63605	3.12751	12.5917	826.365	26.8819	38.9822	61.5632	58.8015	37.0261	63.2285	32.6568	10.3024	46.4846	1.05698	8.38312	2.30714	3636.77	2.31651	0.3807	381.705
Ames-13751	WCC	1	4	47.8986	13.768	16.125	91.25	48.875	72.25	148.125	27.5	17.125	451.25	2.26967	3.17801	12.3187	853.551	27.8246	39.1842	62.4877	57.5763	36.8074	63.8342	34.1018	10.7087	47.0016	1.15849	9.45275	2.71076	3586.87	2.31107	0.371529	316.881
Ames-13753	WCC	1	4	52.5	17.375	19.875	103.625	38.125	52.5	104.875	18.75	11.5	208.75	2.84436	4.25104	13.9263	820.18	26.6811	38.2495	57.099	58.4051	37.0378	61.8046	31.9624	10.0848	42.6009	1.05399	7.58775	3.3157	2301.62	2.88325	0.336171	362.752
Ames-13754	WCC	1	1	52.576	11.8271	17.625	95	42.25	61	143.625	30.125	19.375	547	2.44092	3.19029	13.6382	828.4	27.4094	38.6689	61.4903	56.8138	36.2338	63.4521	32.5894	10.1126	45.809	0.923613	6.82112	3.14735	2181.21	2.77898	0.339686	301.249
Ames-13755	WCC	1	4	52.2291	13.6619	18.75	98.25	35.875	50.75	127.5	23.125	10	217.5	2.55573	3.55175	13.2798	823.032	26.5974	38.1815	58.7409	55.9103	36.9897	62.3106	32.2096	9.90511	43.7197	1.0863	8.209	3.60601	2311.13	3.06557	0.3433	379.747
Ames-13757	WCC	3	2	59.625	15.375	29.25	118.375	38	56.625	170.25	25.625	8.75	216.875	2.57141	3.70508	14.9895	833.697	27.9907	40.8539	60.6925	57.098	37.6373	67.1325	31.248	10.2346	45.4082	0.753294	5.00162	3.09335	1607.92	2.8975	0.397257	363.586
Ames-13758	WCC	2	1	54.375	17.875	22.25	108.25	47.125	66	161.375	28.125	8.375	234.75	2.57254	3.39393	13.4603	832.223	27.1285	38.8437	58.7001	57.8756	37.8282	63.6996	32.2112	10.2757	44.7051	1.00893	7.52987	2.93426	2591.85	2.92676	0.354519	394.9
Ames-13760	WCC	1	1	53.125	15.25	21	103.625	42.25	61.625	157.5	30.125	9.875	301.625	2.56179	4.23816	15.5271	821.842	27.7469	38.8641	60.4396	53.2996	36.5506	63.9095	31.4564	9.82876	45.7865	0.925194	6.06225	1.94532	3012.48	1.95393	0.377966	344.846
Ames-13761	WCC	1	1	47.0863	16.2334	15.625	92.125	48.375	69.5	147	33.75	5.75	194.375	2.51476	3.15387	12.1541	846.472	26.9078	38.938	60.2935	58.1376	39.1546	64.3105	33.0608	10.1872	45.3126	0.923076	7.63012	3.15462	2418.64	2.90307	0.341358	409.633
Baer-II	WCC	1	4	41.6742	17.3986	17	89.375	42.25	59.875	120.5	27.25	13	330.375	2.52487	3.90778	14.8672	842.197	28.2339	38.3854	59.6298	53.5496	34.2598	62.3031	32.3355	9.84659	44.5775	1.10626	7.44862	2.15161	3487.03	2.1596	0.408942	349.143
BO-03	WCC	1	4	38.267	13.7536	21.5	85.125	44.25	63.5	80	23.25	5	115.5	2.46658	3.33642	12.1591	834.962	26.6797	38.9383	61.3304	57.0845	37.2954	63.0463	33.7035	9.8454	45.595	1.1251	9.2595	3.08114	2991.27	2.63873	0.35795	325.362
BO-11	WCC	1	4	43.649	13.6683	19.25	91	42.625	61.75	123	25.625	7.125	186.375	2.60868	3.84357	15.0207	823.846	27.3408	38.9941	60.1563	54.6596	35.9215	62.8327	31.9013	9.55939	45.051	1.11146	7.38925	2.68521	2757.7	2.41069	0.373285	357.744
BO-13	WCC	1	1	50.5148	16.2334	15.8058	101.25	41.875	59.25	129.125	27.875	5.875	177.25	2.6428	3.92446	12.8568	843.173	27.1898	39.5111	59.486	56.8749	36.7722	63.7633	32.6948	9.92067	44.456	0.919524	7.12962	2.59305	2764.06	2.55243	0.343067	379.124
BO-16	WCC	1	4	50.567	13.6486	18.875	96.125	40.5	57.25	123.375	25.5	6.25	159.5	2.48793	3.64039	14.298	831.925	27.6731	39.3194	60.5261	53.9193	35.6232	63.0338	32.3605	9.84323	45.8238	1.0282	7.19512	2.33196	3092.71	2.28899	0.385674	347.42
BO-17	WCC	1	4	56.25	9.625	16.875	97	36.125	52.25	119.75	20.375	18.25	339.5	2.7083	4.51485	15.127	820.436	27.3248	39.1566	59.3152	55.6709	37.9018	63.9504	31.3259	9.81611	44.3774	1.19547	7.96162	2.6599	2997.78	2.83414	0.318508	398.481
BO-29	WCC	1	4	45.875	12	16.625	88.375	44.125	65.375	113.5	21	9.75	204.375	2.46367	4.07065	13.329	843.804	27.6191	39.7416	59.5367	55.7629	37.0217	64.7886	32.8273	9.77299	44.9027	1.15436	8.64662	2.57323	3346.77	2.50509	0.333793	375.407
BO-30	WCC	1	4	46.6129	13.1966	15	89	42.875	63.625	113.875	23.625	15.5	336	2.53188	3.44407	11.8367	855.524	27.1176	40.2305	60.3652	56.6326	37.6574	65.5691	32.8887	9.88175	45.1145	1.20845	10.2299	3.26387	3123.41	2.79178	0.350218	385.482
BO-31	WCC	1	4	42.8028	15.9864	16.178	90.5	42.5	60.125	109.125	21	7.5	157.5	2.52543	3.61377	13.6849	840.522	27.609	39.8096	60.156	55.2637	37.4124	65.1695	32.3106	10.1049	45.5316	1.00817	7.38037	2.28439	3248.76	2.3052	0.367815	392.328
BO-32	WCC	1	4	46.0431	13.8194	15.5	87.75	39.875	56.25	95.75	25.125	7.125	179.875	2.62407	4.04586	14.7444	834.455	27.9921	38.9463	59.1923	55.2059	35.8525	62.9999	32.0003	9.88491	44.6582	1.03224	6.9695	1.84876	3775.97	1.95467	0.368248	376.448
BO-40	WCC	1	4	49.5148	14.6619	18.125	96.125	43.875	64.25	142.625	26.25	7.125	185.5	2.5603	3.95366	13.5662	843.727	27.5953	39.7167	60.9367	55.2251	37.006	64.1395	33.0326	9.96274	45.9268	1.20732	8.93687	2.70241	3314.42	2.32863	0.346622	358.929
BO-42	WCC	1	4	49.6129	16.4823	15.375	94.75	43.625	64.25	137.375	23	8	182.5	2.50032	3.47197	12.1192	842.125	26.9413	38.9845	59.7304	58.7726	37.9632	63.4699	33.4509	10.6169	44.9992	0.933067	7.7425	2.66414	2930.23	2.54365	0.324869	372.916
BO-46-2	WCC	1	1	49.75	17.75	16.5	95.875	43.625	64.25	148.75	26.875	7.125	196.125	2.5826	3.58825	12.5364	850.66	27.2265	39.2469	60.2881	56.2472	37.4008	63.9063	33.249	10.3219	45.8454	1.00351	7.97575	2.49014	3209.56	2.16878	0.345755	362.67
BO-51	WCC	1	4	50.75	18	28.625	112.125	47.125	68.875	118.5	22.75	8.125	188.25	2.29056	3.87725	13.6936	840.029	27.9597	40.8269	62.5241	55.263	37.4224	65.9622	32.8529	10.1558	47.1318	1.113	8.123	2.25708	3591.05	2.20752	0.349141	350.367
BO-52	WCC	1	4	51.5	12.875	16.375	94.75	45.75	64.5	139.125	22.125	8.5	191.875	2.63546	3.0553	11.8199	847.065	27.012	39.3538	60.7526	59.7968	36.0958	63.4007	33.7218	10.531	45.8666	0.911568	7.66325	2.47426	3095.52	2.25132	0.364575	371.217
BO-55	WCC	1	4	49.267	12.3536	16.875	93.125	44.75	62.5	126.5	22.75	8.625	196.375	2.56912	3.6562	13.5166	832.605	27.1496	39.3576	60.149	56.3585	36.895	63.5658	32.6249	9.74077	45.1524	1.25267	9.24312	2.8801	3205.37	2.6463	0.383027	375.453
BO-58	WCC	1	4	47.5	13.125	15.875	90.375	41.875	60.125	106	24	16.25	354.25	2.51155	3.55959	12.5704	835.921	26.9532	39.1575	60.47	57.2728	37.0609	63.7603	33.0273	10.1315	45.6693	0.857798	6.997	2.70044	2672.62	2.53929	0.400737	345.053
BO-60	WCC	1	4	44.9725	14.31	16.875	91.125	41.25	59	115.625	23	5.5	127	2.70878	3.57293	14.1765	827.632	27.2976	38.6713	58.9647	54.7727	35.0468	62.0089	31.9102	9.48715	43.835	1.16024	8.31475	2.954	2842.44	2.58557	0.37467	361.524
BO-63	WCC	1	4	44.2813	11.9343	25.75	87.875	46.375	62.625	108	24.625	8.25	207.25	2.87111	4.45607	16.4338	828.148	27.626	39.6928	58.8273	52.5156	35.1339	63.2879	31.4185	9.06382	43.699	1.16423	7.08225	3.34865	2102.97	2.89945	0.3844	342.118
Bouchane-1	WCC	1	4	37.5431	14.9861	19.875	88	39	53.25	90.625	23.625	13.375	303.75	2.30252	3.05175	12.9752	825.963	27.1615	39.0475	61.1786	55.7446	38.5441	64.641	32.0039	10.2465	45.7089	1.02384	7.8585	3.10323	2535.23	2.95943	0.36486	403.265
Bouchane-2	WCC	1	4	38.1219	8.85573	23.625	85.25	40.375	61.625	80.375	24.75	4.875	122.25	2.5924	3.19889	13.802	829.769	26.6093	38.3782	59.5966	58.234	37.7334	62.7512	32.6477	10.3408	44.7516	1.2447	8.98675	3.3544	2707.42	3.26427	0.343815	375.683
Bouchane-3	WCC	1	4	39.326	15.0771	20.625	85.875	42.375	60.5	87.5	28.125	7.25	196.25	2.57221	3.1542	12.0771	842.134	27.2041	39.7473	60.9492	58.3065	38.1459	65.2013	33.027	10.498	46.1729	1.01445	8.40712	2.69476	3124.54	2.73401	0.358247	400.625
Bouchane-4	WCC	1	4	37.467	12.9536	23	89	43.625	61.25	87.5	24.5	6.125	150.375	2.62758	3.70526	14.3784	833.476	27.2773	39.5976	60.3516	54.0018	37.8615	64.2464	31.9398	9.85472	45.3795	1.1579	8.11962	3.41194	2394.69	3.31676	0.35688	387.252
Brightest-Brilliant-Rainbow	WCC	1	4	43.94	15.335	16.625	88.25	46.875	69.125	120.25	24.75	6.875	165.625	2.6667	2.84704	12.1424	827.063	26.3203	37.1529	59.193	60.0554	37.5267	61.0626	33.5331	10.4273	44.917	0.943312	7.83612	2.85892	2734.44	2.66533	0.348251	366.985
CHEN-109	WCC	2	2	55.25	18.75	28.875	116	45.875	61.875	155.5	28.625	9.25	268.75	3.05252	3.63739	14.7635	805.053	26.618	38.486	58.2415	58.6728	36.7617	63.4315	30.0586	10.1556	43.4528	0.634543	4.30187	2.64301	1602.25	2.75409	0.320348	391.583
CHEN-110	WCC	4	3	80.25	13.91	57.9645	175.875	42.875	61.625	233.625	32.125	21.75	714.75	2.89243	3.71299	16.0563	835.056	27.8285	38.365	54.6646	54.7306	36.2914	62.3417	29.4467		41.3596	0.341208	1.08675	1.8369	733.412	2.358	0.308709	405.075
CHEN-112	WCC	3	2	52.75	13.8161	38	117.375	41.463	59.7261	166.5	35.625	10.5	377	2.73789	2.90731	13.7879	836.126	27.1105	38.1755	59.3889	55.2025	37.495	64.4794	30.1357	10.1574	44.1714	0.414461	3.02837	1.69391	1832.48	1.92546	0.362858	340.441
CHEN-126	WCC	3	2	52.0414	18.6252	23.875	107.625	44.625	61.625	171.125	47.25	7.875	389.875	2.53732	4.20903	14.7391	814.963	27.021	38.9045	60.9228	52.1741	37.2569	65.3423	31.0576	9.59845	45.2313	0.869156	5.93012	2.41809	2467.27	2.39464	0.314507	427.766
CHEN-128	WCC	3	1	51.125	15.25	26	106.5	39.5	56.75	138.375	44.5	12.75	598.375	2.75534	3.57582	13.3574	834.873	27.24	38.3854	58.5605	55.8409	36.6214	63.9373	31.8009	10.1713	43.8676	0.882303	6.4475	2.62238	2466.97	2.5648	0.367039	421.24
CHEN-140	WCC	2	2	53.25	16	31.75	115.5	47.5	67.5	177.75	42.125	10.125	418.625	2.72486	3.35765	15.1375	810.589	27.1987	37.9869	58.6587	55.1221	36.9546	63.3392	30.1321	9.79436	43.8222	0.827333	4.88312	3.04881	1566.77	3.0514	0.342985	424.595
CHEN-141	WCC	2	1	46.125	18.875	22.5	102.25	45	62.375	125.25	34.125	7.125	249	2.88888	2.83925	15.7603	803.513	26.9371	37.1709	56.7272	53.8803	36.4651	62.3648	28.6539	10.0235	41.6234	0.407872	2.18612	3.27312	658.384	3.04256	0.382085	431.13
CHEN-142	WCC	4	3	50.4916	18.394	47.1912	150.125	45.75	65.25	185.875	54.7751	19.7068	1097	2.68989	3.58776	14.1119	831.047	27.5913	38.6697	58.2356	56.0721	35.9435	62.556	31.2078	10.1289	43.8388	0.538916	1.97175	2.14819	1756.23	2.37259	0.340721	381.192
CHEN-144	WCC	3	2	51.372	17.0905	31.875	113.125	43.375	64	158	41.125	10.25	420	2.71334	3.96182	13.4279	833.354	26.8747	38.1616	59.0876	52.961	37.5842	64.9884	30.6632	10.0263	43.7129	0.568293	4.21725	1.7781	2392.98	1.9872	0.327065	433.536
CHEN-147	WCC	3	2	51.5	14.25	28.75	108.625	41.25	58.25	159.625	50.375	8.125	415.625	2.71123	4.24438	14.8777	825.965	27.2935	38.9347	60.222	52.0115	36.8392	65.7774	30.3422	9.77374	44.4423	0.578427	3.84137	2.20346	1735.22	2.31455	0.310119	433.332
CHEN-151	WCC	3	2	53.25	17.75	32	117.5	42.125	58.375	168	44	8.75	378.75	2.66285	3.6205	14.5326	807.6	26.8803	38.0167	58.2931	55.1627	37.0082	63.762	30.7584	9.66232	43.7542	0.659083	4.59737	2.20599	2063.93	2.34179	0.30757	435.64
CHEN-155	WCC	3	1	47.8986	17.768	31.875	112.5	42.25	59.625	145	48	7.625	371	2.51209	3.93843	14.0339	819.275	27.1908	38.6571	60.407	53.2068	37.4563	64.9315	31.0689	10.0864	45.1299	0.607905	4.34837	1.87378	2287.95	1.99138	0.307667	410.29
CHEN-159	WCC	2	2	50.2291	15.3762	32.375	115.625	46.5	65.125	167.625	46.25	11.875	556.75	2.83419	3.42685	13.9123	821.298	26.7746	37.8717	59.1691	53.2471	36.4828	63.6197	30.6917	9.79173	43.9854	0.669137	4.38212	2.46592	1661.87	2.41832	0.33159	338.911
CHEN-160	WCC	1	4	45.75	18.625	17.875	96.5	39.875	55.5	104.875	37.125	8.375	310.625	2.6149	3.70881	13.2629	852.162	28.0295	40.6107	60.6345	53.9902	36.5882	66.6316	32.6711	9.78859	45.7658	0.947078	7.14075	2.04401	3519.48	1.97956	0.340474	426.406
CHEN-161	WCC	3	3	48.9823	19.835	48.75	131.625	45.5	64.875	190.75	52.5	11.875	615.875	2.64792	2.87826	12.9409	839.275	27.1423	38.0177	58.9805	56.0069	36.4393	62.3407	31.3934	10.148	43.9779	0.586455	3.99712	2.09629	2105.42	2.20139	0.304472	364.224
CHEN-162	WCC	2	2	51.25	15.5	27.875	109.125	46.375	66.625	173.25	50.5	10.625	523.125	2.71971	3.17285	15.4317	801.366	26.7098	37.9303	59.8771	54.2729	36.3629	63.2298	30.0032	9.71318	44.1556	0.843914	5.465	2.70537	2041.33	2.92557	0.355917	414.565
CHEN-174	WCC	3	2	49.5	13.875	25.25	103.125	45.125	65.625	163.25	42.875	10.25	433.375	2.75454	3.98389	14.8721	842.569	28.327	40.177	59.828	56.5264	36.7052	65.6247	31.2431	10.7609	44.8845	0.753042	4.47587	2.34904	1853.29	2.3963	0.346798	364.996
CHEN-182	WCC	3	1	49.125	17.375	32.454	115.5	40	55.625	115.375	30	6.625	202.75	2.86155	3.15012	14.999	819.126	27.303	37.6835	57.9919	54.2488	36.6798	62.5007	30.2132	9.97106	42.625	0.524663	3.14375	2.5028	1263.65	2.71254	0.348266	411.868
CHEN-192	WCC	2	1	46.25	25.375	24.375	109.625	41.5	59.25	136.375	38.875	7.375	284.875	2.60467	3.57167	13.7185	828.493	27.2209	38.8096	59.6515	54.8248	37.4144	65.0219	30.9861	9.87007	44.5234	0.711122	5.19162	2.51028	2054.77	2.59367	0.330555	421.85
CHEN-197	WCC	3	2	55.375	15.875	32.6656	114.5	40.9581	56.9001	161.875	39.25	7.75	299.25	2.50236	2.4936	13.11	830.366	26.5852	37.5612	60.2155	55.398	37.0833	62.8839	31.2453	10.0625	45.006	0.654288	4.39862	1.75068	2408.32	1.95204	0.339163	372.042
CHEN-199	WCC	3	1	52.1843	15.768	28.75	110.75	40.5	54.875	132.875	40.5	7.875	322.625	2.43242	4.23764	13.8573	828.443	27.2903	39.1118	60.9151	51.8589	38.064	66.3091	31.2844	9.74118	45.5288	0.785663	5.67425	1.95869	2942.75	2.08382	0.308631	437.222
CHEN-205	WCC	3	2	59.4316	13.1957	40.4094	126.25	43.5	61.25	174	52.75	8.125	431.75	2.8696	3.48008	14.1576	825.512	27.2368	38.5326	57.9757	55.1926	36.7567	64.2777	30.8743	9.84213	43.7888	0.693842	4.9045	2.39473	1998.25	2.39906	0.326957	421.653
CHEN-212	WCC	4	3	57	19.5858	53.3936	149.625	41.25	58.125	183	58.625	19.125	1115.5	2.6638	3.31587	12.593	878.266	28.6013	38.9376	56.8895	57.9995	36.4684	64.2478	31.5128	10.8367	42.6768	0.310791	1.68725	1.41128	1011.68	1.89972	0.344579	388.311
CHEN-218	WCC	2	2	51.875	20.375	29.625	116.25	44.5	61.25	163.25	32	10.625	336.625	2.82	4.07522	17.4062	795.156	27.1911	38.2438	59.2634	52.5079		63.9607	29.7242	9.33276	44.3036	0.775917	3.48337	2.91201	1121.7	3.06031	0.365119	392.251
CHEN-219	WCC	2	2	45.875	20.625	26.5	107.5	45.625	69.75	144.75	37	6.5	239.25	2.92459	2.19855	14.8229	811.93	26.8092	36.7451	56.0212	54.361	36.0537	60.9207	28.9733	10.2197	41.3016	0.231	1.82675	3.17225	560.482	3.03415	0.344236	431.664
CHEN-220	WCC	3	1	52.75	17.625	32.875	118	40.375	55.125	128.5	33.25	8.25	283.25	2.60276	4.38542	14.7681	829.859	27.5021	39.1614	60.1486	51.2419	37.539	65.97	30.5345	9.72252	44.5833	0.611329	4.1785	1.84706	2277.93	1.97293	0.302961	431.569
CHEN-221	WCC	2	2	52.625	15.375	25.625	107.875	51.625	72.375	172.25	48.75	6.875	337.625	2.7278	4.2264	15.6205	833.414	28.3891	40.0416	60.1121	53.6214	35.9474	65.2873	31.0538	9.95267	44.8522	0.878154	5.33262	2.69435	1964.45	2.49375	0.358317	344.385
CHEN-222	WCC	3	2	47.8005	15.9477	34	110	44	64.375	177.375	46.375	9.375	409.625	2.4734	3.91779	14.6463	814.208	27.0683	38.6727	60.941	51.8465	37.3857	65.1336	30.9071	9.57295	45.3746	0.766725	5.24825	2.156	2428.62	2.11427	0.333706	399.635
CHEN-224	WCC	2	2	50.625	16.125	39.0218	123.125	49.2438	66.6144	158.375	36.75	13.625	487.875	2.96021	3.41081	14.4016	826.941	27.2651	38.5556	57.5293	58.2989	36.7167	63.8738	30.5241	10.6253	43.0959	0.593211	3.56125	2.57477	1309.11	2.70177	0.307314	404.697
CHEN-225	WCC	2	2	54.375	13.125	38.875	120.75	52.125	74	191.125	45.75	10.75	506.625	2.81908	3.89232	14.947	822.127	27.6931	39.049	60.3611	54.0818	34.8623	63.5207	31.3262	9.42673	45.0719	0.841293	5.62225	2.80019	2092.42	2.52277	0.380392	314.947
CHEN-226	WCC	2	1	52.125	14.875	29	110.625	46.5	65.25	142.75	34.25	9.75	346.875	2.59677	3.14896	15.011	806.025	26.5438	37.7803	58.7154	53.0413	37.7211	63.5567	30.0714	9.67001	43.4744	0.7731	5.20562	2.76464	1897.3	2.83568	0.316172	427.341
CHEN-256	WCC	3	2	53.5	17	32.8784	120.875	44.5	65.5	170.5	48.375	11.125	542.5	2.60148	3.83617	13.3358	824.145	26.8022	38.8859	61.6734	52.8011	38.2681	66.2307	31.25	9.77737	45.8855	0.589085	4.449	2.27092	1939.15	2.25268	0.328017	431.382
CHEN-291	WCC	2	1	53.375	15.625	18.5	102.125	45.375	60.25	145.875	28.5	12.25	356.5	2.59648	3.88842	15.0313	831.485	27.8934	40.1569	60.6478	53.7858	36.3199	62.9262	30.9035	9.04174	44.9112	0.979999	6.50937	3.68991	1762.89	3.16378	0.323515	236.619
CHEN-297	WCC	4	3	71.375	19.5	53.3772	160.875	43.0085	59.6632	183.5	33.75	17.375	582.25	2.98172	4.50046	14.3695	842.695	27.4184	38.4622	57.7512	51.3964	36.6311	63.9358	30.3186	9.855	42.6874	0.410334	2.51987	2.1375	1159.13	2.3267	0.325106	410.916
CHEN-298	WCC	2	2	49.7557	18.1966	42.375	124.375	49.625	74.25	188.5	42	10.75	459.375	2.86096	3.60152	14.614	831.254	27.4931	38.4297	57.1465	53.7083	36.5333	63.2401	30.5417	10.0519	43.1218	0.709141	4.1745	2.7129	1438.87	2.85346	0.32211	390.961
CHEN-299	WCC	3	1	47	14.375	36.125	112	45.5	62	144.25	46.75	11	503.5	2.53424	3.40577	14.1777	827.144	27.4194	38.3691	60.5982	52.977	36.459	64.3865	31.3307	9.86425	45.6783	0.576473	4.01825	2.21253	1795.97	2.33031	0.346322	354.555
CHEN-302	WCC	3	2	52.2291	12.8048	33.375	112.875	41.875	58.25	167.75	48.75	9.5	464.375	3.03213	4.20419	15.2071	821.286	27.3338	38.3816	57.5875	53.8989	34.5911	61.9033	30.7875	9.84182	42.7836	0.800666	5.3105	2.11958	2486.44	2.18405	0.315379	401.61
CHEN-319	WCC	2	2	57	16	27.125	114.625	41.375	63.625	157.375	25.5	11.375	282.875	2.99049	3.94391	16.24	815.49	27.404	38.4289	56.8842	53.6479	36.5467	63.852	29.455		42.6591	0.566056	2.33775	2.92248	974.921	2.85598	0.322846	407.984
CHEN-322	WCC	3	1	51.75	14	23.6874	103.25	41.875	57.875	133	38	9.25	356.75	2.57219	3.84034	14.4529	815.115	26.9903	39.3614	61.002	54.1324	38.1269	66.3357	30.8376	9.9546	45.9653	0.695629	4.81612	2.08052	2298.79	2.11923	0.322503	414.537
CHEN-33	WCC	1	4	45.6345	14.6797	16	89.375	42	58.25	108.625	23.25	16.25	357.625	2.50272	4.31754	14.5784	838.67	28.1165	40.1561	59.4311	52.7224	35.0515	64.127	31.9476	9.31699	44.4838	1.14097	7.8485	1.79523	4355.08	1.88529	0.373557	379.579
CHEN-330	WCC	2	2	53.6577	12.5191	37.5	116.75	49.5	67.75	167.75	41.125	14.5	601.375	2.9664	3.76326	15.7149	805.44	26.7675	36.9352	57.1405	54.5373	36.1334	61.5895	29.5022	10.0249	41.7487	0.638831	3.59237	3.19747	972.559	3.14575	0.336471	418.473
CHEN-333	WCC	-	3	81.7557	13.5795		176.75	41	57.125	206.875	40.625	18.375	775.75	3.00664	3.03346	15.157	827.405	27.0855	37.0372	54.6677	54.5367	35.7248	60.0449	29.1599	10.2051	40.6174	0.28164	1.22437	2.14092	727.788	2.45935	0.322862	337.821
CHEN-339	WCC	3	3	55.625	23.375	48.625	141.5	46.5	63.25	167.25	44.375	12.75	598.5	3.00407	3.00441	12.6108	849.656	27.218	37.4773	56.8337	55.7226	36.0603	62.4313	30.4866	10.2344	42.2656	0.369804	2.84687	2.36626	1217.53	2.46813	0.31784	400.006
CHEN-342	WCC	3	2	52.375	19.5	26.25	112.625	41.375	58.125	167.75	49	9.75	482.75	2.91892	3.74375	14.7207	829.034	27.6394	39.2006	57.974	54.9041	35.6576	63.8728	30.7464	10.1012	43.7751	0.671809	4.583	2.10366	2260.61	2.27399	0.298942	401.956
CHEN-344	WCC	3	1	51.375	18.375	33.375	117.5	38.625	54.625	139.875	40.625	11.25	465.5	2.55836	4.11212	13.6619	843.86	27.79	39.4821	59.8706	54.8498	37.4923	65.659	31.7366	9.95022	44.5999	0.708045	5.3	2.27065	2330.16	2.34119	0.31782	418.611
CHEN-349	WCC	3	3	62.375	17.375	40.5054	134.125	44.75	60.125	191.75	43.25	9.75	419.625	2.8336	4.4813	15.2844	816.155	27.0402	38.6673	58.7328	52.3939	37.1632	64.983	30.2704	9.60584	44.3856	0.587183	3.84225	2.28832	1732.54	2.30637	0.359555	422.976
CHEN-350	WCC	3	2	53	19.25	32.25	118.625	40.75	59.75	146.75	31.125	9.75	307.875	2.88065	2.37235	13.2363	827.829	26.929	37.335	56.7205	57.8716	36.5772	63.2495	29.5958	10.5566	42.5526	0.292421	2.07987	2.6801	776.004	2.71566	0.355845	432.354
CHEN-354	WCC	2	1	53.25	15.25	21.375	104.125	45.25	63.875	134.25	24.25	10.375	255.375	2.81843	3.50703	14.774	805.557	26.8555	38.0353	58.0766	56.764	36.8085	63.1539	30.1905	10.4962	43.4831	0.579292	3.93137	3.18633	1220.71	3.07172	0.319176	393.182
CHEN-358	WCC	4	3	64	19.1957	41.5855	147.125	47.25	69.25	232.5	40.75	15.375	650.25	2.80436	3.5093	16.7122	810.369	27.5628	38.8949	58.7885	54.1281	35.494	63.1402	30.3432	9.45364	44.205	0.650006	3.494	2.44723	1614.97	2.62203	0.301976	330.24
CHEN-361	WCC	3	2	50.1843	17.835	37.125	117.625	42.75	59.5	151	39	12.625	506.5	2.60256	3.4772	13.6429	826.441	27.0242	38.077	58.7392	54.4893	37.4339	64.0878	30.8464	10.2145	44.2466	0.499984	3.67875	2.3336	1640.39	2.40815	0.311809	405.79
CHEN-376	WCC	v	2	54	16.91	24.0955	113.375	40.75	57.375	175.125	41.625	12.375	514.875	-	-	-	-	-	-	-	-	-	-	-	-	-	-	4.03062	1.19232	3445.68	1.41378	0.424622	256.433
CHEN-382	WCC	3	2	54.75	12.7915	33.0356	112.875	37.375	51.625	155.875	48.875	9.625	479.625	2.7605	3.84454	14.2978	826.629	27.5698	39.2158	58.4464	55.5594	35.9686	64.8519	30.9795	10.0938	43.9813	0.720292	5.06862	2.46887	2081.33	2.47611	0.331866	403.857
CHEN-383	WCC	3	2	59.5	18	48.5	140.125	35.75	50.75	159	33	13.25	444	3.12519	3.03611	12.4546	858.084	27.2448	37.0205	54.135	56.9074	36.0759	61.6686	30.1193	10.3841	40.0724	0.323002	2.605	2.08313	1282.13	2.25105	0.334752	411.28
CHEN-384	WCC	3	2	52.5	22.75	41.375	129.875	44.5	60.125	164.5	42.875	11.625	527.5	2.92335	2.87109	13.7447	847.09	27.9374	39.3327	58.3397	55.9758	35.8647	63.6265	30.9169	10.2367	43.486	0.508965	2.84487	2.51781	1409.94	2.6254	0.298974	399.2
CHEN-389	WCC	2	2	52.625	14.375	34.625	117.375	41.25	55.25	160.25	38	12.125	475.625	3.18547	3.5504	15.7614	807.226	26.9786	37.787	56.961	56.4903	35.7764	61.7317	29.6469	10.4201	42.9837	0.729232	4.54637	3.00613	1446.88	2.90288	0.324313	394.532
CHEN-390	WCC	3	2	52.625	18.375	46	131.25	47.125	66.25	171.75	32.25	12.75	411.625	3.1156	3.2138	13.4732	843.787	27.4055	37.7724	56.0202	55.0412	35.4019	61.7703	30.2305	10.0159	41.8274	0.492411	2.7945	2.09302	1389.91	2.36909	0.356672	377.095
CHEN-391	WCC	3	2	57.25	18.25	34.75	124.375	39.25	53.875	157.75	41.75	13.625	536	2.96654	2.54773	13.441	837.264	27.5191	37.6361	56.6221	55.6478	35.4938	62.8589	29.7358	10.3409	42.1577	0.366195	2.369	1.972	1369.87	2.22882	0.323504	419.375
CHEN-397	WCC	2	1	49.7557	12.9109	21.5	97.875	44.25	62.5	137.375	27.125	8.5	231.375	2.87872	4.11285	16.9312	803.063	27.4005	38.6049	58.2542	54.6092	36.3927	63.5486	29.6056	-	43.3447	0.792241	4.69712	3.62912	1297.78	3.31656	0.30922	408.639
CHEN-398	WCC	2	1	47.8986	19.4823	26.125	107.25	45.75	67.875	142.125	34.625	6.125	214.5	2.70245	2.3232	15.8219	795.357	26.3306	37.6143	57.6217	53.6056	35.6403	62.0058	29.0484	9.75395	42.6596	0.495252	3.28737	3.06465	1061.4	3.04287	0.384981	427.463
CHEN-400	WCC	2	2	49.875	19	28.875	112.125	44.75	61.625	161.625	37	8.875	328.625	3.08676	4.21912	16.3065	816.844	27.8131	38.5197	58.9782	54.9133	33.5178	63.0787	29.8174	9.84597	43.6456	0.642136	3.86712	3.24947	1206.24	3.24412	0.351603	399.062
CHEN-401	WCC	2	2	58	12.5	27.25	112.375	43.25	57.625	156.125	35.5	7.125	255.75	2.84917	3.32913	15.0977	796.724	26.5137	38.1146	58.6795	55.2192	36.4653	61.2112	30.2707	9.83156	43.6266	0.748386	5.02687	2.81284	1704.45	2.9647	0.297066	406.154
CHEN-404	WCC	3	2	51.875	17	37.159	121	41.25	59.5	158.75	50.25	11.625	589.625	2.72648	3.69166	13.2286	822.008	26.749	38.6598	58.7086	55.1407	36.5159	63.7276	31.5344	9.85542	43.9079	0.719798	4.81912	2.03792	2228.43	2.05051	0.338013	404.404
CHEN-406	WCC	3	2	53.375	15.375	45.625	129.75	39.375	54.25	165.375	50.875	10	508.875	2.6958	3.54735	13.4871	834.442	27.3468	38.7024	58.7181	55.7315	37.5891	65.2935	31.3664	9.96962	44.295	0.573972	4.51825	2.03363	2145.48	2.29868	0.310008	433.931
CHEN-411	WCC	2	2	48.467	16.5536	31.5	113.375	43.875	63.375	170.5	49.25	9.125	448.25	2.99854	3.32803	14.5695	813.598	27.0379	38.0699	56.9716	55.942	35.854	62.1866	29.9989	10.2256	42.9754	0.571648	3.03712	2.68176	986.313	2.63292	0.349722	376.391
CHEN-412	WCC	3	2	50	18.5	35.625	119.75	41.5	59.125	153.25	38.125	9.75	386.875	2.90604	2.83847	14.2938	825.271	27.0122	37.3925	55.7073	55.6737	36.1979	62.3359	29.3003	10.3045	41.7558	0.398846	2.5395	2.64456	917.264	2.75851	0.353681	402.381
CHEN-413	WCC	3	2	59.875	15.125	42.125	133.625	37.625	54.25	172.25	42.125	9.875	415.75	2.67658	4.30266	15.1056	800.755	26.7962	38.2188	59.4189	51.6752	36.6221	63.8657	30.1689	9.62827	44.5204	0.647123	4.29587	2.1221	2011.02	2.25045	0.299504	427.032
CHEN-415	WCC	2	1	54.375	13.75	23.125	106.25	44.125	61.875	157.5	34.5	6.875	237.75	2.97324	4.06344	15.8644	810.653	27.6536	38.2263	58.8827	55.6782	35.6236	62.8054	29.9306	10.2558	43.1716	0.706494	4.43237	3.05785	1412.38	3.15131	0.292765	386.905
CHEN-416	WCC	3	3	58.625	19.625	42.125	134	41.875	59.125	198.875	50.375	14.875	776	2.74008	3.5735	13.0032	831.372	27.3416	39.2747	58.5381	55.7442	35.6429	62.8751	31.5927	10.3167	44.28	0.733492	5.47862	2.23205	2475.51	2.49049	0.305853	394.076
CHEN-417	WCC	2	2	47.8986	18.0537	32.25	111.875	48.625	68.875	173.375	42	9.5	392.625	2.78011	3.52993	15.1278	814.43	27.2912	38.0516	58.1613	54.478	36.2047	63.5727	30.0003	10.0353	42.9387	0.683233	3.42712	2.99779	1489.21	3.00425	0.336078	407.26
CHEN-420	WCC	3	2	55.5	13.25	53.375	136.625	38.875	52.75	159.625	41	9.875	408.875	2.77069	4.01361	12.9462	835.187	26.718	38.5271	59.0359	51.8722	37.6519	64.9554	30.7865	9.83779	43.8924	0.513032	3.9755	2.07899	1862.37	2.30667	0.318981	431.374
CHEN-423	WCC	3	2	59.75	19.5	33.625	127.375	36	49.125	149.875	36.75	14.375	529.125	2.98651	3.73773	14.1332	843.094	27.8095	39.361	58.1809	57.2103	35.4544	63.2062	31.4071	10.3123	43.3528	0.666625	4.71487	2.0216	2351.61	2.33208	0.32386	389.117
CHEN-424	WCC	3	2	55	16.75	38	123.625	42.25	59.25	155.875	42.375	12.375	514.5	2.88509	4.44908	14.6092	842.374	27.6068	39.1277	58.4463	51.6937	36.4719	64.4179	30.7678	10.1373	43.4514	0.598828	3.36375	1.92137	1668.95	2.12697	0.309036	410.559
CHEN-425	WCC	3	3	65.4017	8.13375	65.3341	155.875	45.625	62.25	190.125	46.5	14.125	642.375	3.01349	3.51506	15.5125	814.675	27.0427	37.6372	58.4379	52.4304	36.1145	62.4625	29.6618	9.56817	42.5958	0.510354	3.50125	2.21713	1547.6	2.31257	0.340474	407.44
CHEN-427	WCC	3	1	47.7557	14.4823	21.625	97.5	39.875	55.125	144.125	42.25	7.875	334.75	2.52691	4.03555	14.5132	803.554	26.4343	38.4907	61.4065	51.999	38.0932	65.0367	30.9224	9.47446	45.5803	0.836488	5.79175	2.28922	2630.52	2.26606	0.346748	424.967
CHEN-429	WCC	2	2	52.5	18.75	37.7703	123.25	43.875	60.625	166.75	41.625	10.25	427.5	2.91573	3.49434	13.7427	822.48	26.9421	38.7974	58.6762	57.632	36.1676	62.2827	31.0257	10.2252	43.8849	0.754527	4.89612	2.61494	1714.95	2.82309	0.325914	389.582
CHEN-430	WCC	3	1	51.567	15.6486	37.2336	120.75	37.4952	58.9626	107.125	39.75	9.625	372.75	2.46916	2.96418	14.9827	839.133	28.5496	40.3595	63.0429	56.8788	36.4504	64.7656	31.5174	9.72509	46.6448	0.762764	3.34537	2.36707	1497.63	2.29248	0.369492	318.471
CHEN-433	WCC	4	3	59.375	19.25	73.9645	176.875	44	63.375	205.5	42.125	22.75	956.875	2.86545	3.60836	14.568	840.248	27.899	38.114	57.6328	53.2068	35.4636	62.7947	30.4124	10.0948	42.6551	0.431142	1.255	1.36041	910.431	1.75007	0.350313	386.643
CHEN-437	WCC	3	2	58.0863	17.6619	36.75	125.5	43.375	59.625	155.75	46.25	8.125	372.5	2.77916	4.04384	14.7349	810.34	26.6816	38.3383	58.4673	50.968	36.3701	63.8654	30.1312	9.57403	43.8344	0.627589	3.9065	2.25156	1784.77	2.31874	0.335152	417.06
CHEN-450	WCC	3	2	66.063	16.1083	35.75	132.75	44.875	64.25	163.625	40.75	11.75	477.75	2.72613	3.64899	13.9931	829.549	27.4968	38.7918	59.5604	55.1861	37.2278	65.3916	31.0264	9.77124	44.4556	0.688389	4.94612	2.76646	1787.74	2.71937	0.333699	427.685
CHEN-465	WCC	3	1	48.8598	16.2155	23.5	103.625	43.5	60.375	139.875	42.375	11.875	483	2.26054	3.70702	13.5458	829.153	27.2225	39.9854	62.6483	51.8819	37.4045	63.9721	31.7463	8.98419	46.6747	0.758812	5.61487	1.82954	3068.5	1.74422	0.295985	317.651
CHEN-470	WCC	3	3	59.75	21.875	39.2152	138.875	42.625	58.375	169.5	38.375	10.5	392.625	3.01053	2.94329	13.8208	832.905	27.349	38.0077	57.5087	57.4284	36.1909	62.2988	30.158	10.5125	42.6361	0.446092	2.41825	2.04317	1028.6	2.3666	0.324105	408.995
CHEN-471	WCC	2	2	53.375	18	24.5414	107.75	45.625	63.875	164	31.25	9.625	300.375	2.86516	3.5733	14.5174	828.018	27.5279	38.92	59.0542	56.0517	36.2143	63.8052	30.8285	10.0607	44.0797	0.640364	3.8645	2.82332	1493.25	2.88934	0.346473	385.487
CHEN-5	WCC	1	4	45.7252	16.2022	17	91.125	41	58.375	115.5	23	14.25	310.75	2.57366	4.25005	14.8407	842.264	28.2883	40.7296	59.5486	53.1823	35.4809	64.6928	31.7554	9.30345	44.3494	1.03065	6.97412	1.77417	3940.46	1.90294	0.363867	377.472
CHEN-64	WCC	1	4	44.5075	16.8986	16	90.625	42.875	58.25	108	23.625	14.625	338.375	2.52125	4.4276	14.4181	850.189	28.4196	40.7958	60.0321	52.7019	35.4406	65.2342	31.9339	9.3394	44.7114	1.03073	7.15112	1.77692	4062.12	1.87247	0.3755	375.559
CHEN-65	WCC	3	3	58.0414	15.1966	45.113	136.375	47.75	65.875	165.625	30	15.625	497.875	3.23083	3.35968	14.9332	817.688	26.5792	37.3714	56.2548	53.889	36.729	61.8642	29.083	9.8825	41.6144	0.256365	1.202	1.97256	700.803	2.28393	0.327807	426.984
CHEN-66	WCC	1	4	48.5	16.375	15.125	93.75	43.5	61.625	128	30	5.75	185.875	2.57542	3.86219	12.7646	849.344	27.4283	39.8058	59.8776	57.0933	37.0111	64.4075	32.849	10.0443	44.7276	0.868219	6.813	2.56547	2709.82	2.51148	0.348261	376.007
CHEN-69	WCC	3	2	53.625	12.625	52.8408	133.625	40.75	53	133.125	38.75	12.25	479.375	2.86693	4.29853	14.3696	824.339	27.0598	38.7654	59.9993	54.6235	36.7541	64.5799	30.0426	10.0047	43.876	0.363093	2.02212	2.05428	944.731	2.30431	0.33017	414.665
CHEN-7	WCC	1	4	46.375	14	16.375	92.875	41	60.375	125.75	21.375	11.625	245.625	2.63212	4.06914	14.7374	815.39	26.9279	38.3576	58.3701	55.1092	36.1821	61.8292	31.8232	9.57174	43.7252	1.15703	7.83437	2.81569	2792.15	2.50148	0.345432	372.697
CHEN-71	WCC	2	2	47.125	15.875	31.875	109.625	46.5	65.875	157	39.875	5	206.625	2.5084	3.55344	13.9572	823.331	27.2691	39.2376	60.8454	55.0334	38.1162	66.2379	30.8868	10.438	45.5048	0.61738	4.4405	2.77804	1610.99	2.54717	0.322994	414.015
CHEN-89	WCC	3	3	63.75	14	56.3019	148.625	40.875	57.375	169.625	37.5	11.875	451.75	2.89521	4.01011	14.4297	810.167	26.7112	37.9494	56.2982	51.9825	36.2744	62.2201	29.8869	9.7313	43.456	0.462926	2.80762	1.93968	1351.37	2.20848	0.338913	407.255
CHEN-90	WCC	2	1	52.625	14.25	25.75	107.125	45.5	62.125	149.125	26.125	9.125	240.875	2.92689	3.72305	16.0846	799.118	27.207	38.1312	57.3241	55.1647	35.9568	63.4997	29.3725	10.233	42.9646	0.620377	3.85137	3.39114	1116.54	3.2965	0.3236	397.814
CHEN-91	WCC	2	1	54.125	17.875	24.75	111.375	43.25	60	142.5	26.375	8.75	231.25	2.92567	3.68564	15.7645	803.047	27.1485	38.0671	57.6018	55.812	36.4373	63.4916	29.3825	10.7261	42.9767	0.611254	3.8485	3.13397	1229.45	3.20014	0.323322	403.002
Cherry-Vanilla	WCC	1	4	44.4552	12.1891	16.875	87.375	44.875	66.875	113.375	25.375	9	221	2.47898	3.05395	11.2365	841.996	26.5855	38.5317	60.138	60.4358	39.4493	64.2044	33.8759	10.6656	45.4975	0.892377	7.98737	3.0155	2638.51	2.81104	0.352985	391.543
Chucapaca	WCC	2	2	44.649	24.335	22.8304	99.25	46.75	70.75	164.5	40.5	7.25	317	2.75607	3.28171	15.3178	798.588	26.472	37.6952	59.2884	53.0779	36.6645	62.7544	29.7487	9.7472	43.4549	0.534929	3.50975	2.53289	1357.15	2.57475	0.337417	414.174
CICA-127	WCC	2	2	54.0863	17.3762	32.375	117.125	47.125	66.625	161.25	27.125	9.75	266.875	2.91228	3.59619	15.693	824.018	27.7478	38.4164	56.9951	55.323	36.0561	63.9062	30.0535	9.75572	42.7798	0.600371	3.8265	2.77735	1352.17	2.77664	0.331758	402.159
D-10003	WCC	3	2	56.875	15.125	51.25	137.5	36.25	50.875	171.5	45.625	10.5	468.25	2.60232	3.6912	13.5734	833.719	27.4148	39.0141	59.9206	54.9495	37.3298	65.1421	31.4968	9.63436	44.5249	0.659194	4.86925	2.08048	2362.62	2.15384	0.319601	422.354
D-10004	WCC	2	1	49.5	15.25	25	103.25	45.75	67.75	169.375	39.125	9.625	380.5	2.68923	4.62112	17.0786	822.757	28.5161	39.9691	60.8544	52.7087	34.4216	65.0342	31.3437	9.46409	44.2824	1.01028	5.93625	2.79259	2153.42	2.54873	0.366721	374.627
D-10005	WCC	2	2	51.75	21.75	30.75	118.875	44.75	64.125	160.25	31.875	8.125	260.875	2.90633	4.29471	18.4245	819.248	27.947	39.3115	59.2326	53.5745	-	65.0263	29.8618	9.51218	43.985	0.843892	4.48012	3.30258	1359.61	3.33866	0.332498	409.694
D-11889	WCC	1	4	43.4241	12.3629	18.25	87.5	44.375	65.25	103.25	23.125	8.75	198.25	2.3722	3.05062	12.3674	822.477	26.5692	38.7936	61.5274	57.7976	37.1504	62.9466	33.658	9.95999	46.2191	1.22541	9.88575	3.28982	3005.74	2.84964	0.391606	321.021
D-11893	WCC	3	2	50	17.5	34.875	116.5	38.125	54.5	149.125	48.25	7.125	363.125	2.83484	3.23591	12.6275	865.18	27.9341	38.9269	57.4352	55.9934	36.6394	64.9699	31.5875	10.1907	43.622	0.479987	3.7505	1.75546	2128.29	1.98012	0.318231	413.488
D-11918	WCC	3	2	59.75	18.25	40.625	132.875	39.75	54.125	158.25	35.875	14.25	496	2.73256	3.54342	14.2764	823.912	27.2413	39.0338	59.5693	54.7269	36.5868	64.5197	30.9289	9.66068	44.3773	0.60724	3.81412	1.70552	2176.66	1.97288	0.292275	420.087
D-11924	WCC	3	1	46.5	18.5	18.5	97.625	39.5	54.25	133.5	46.375	7.75	360.875	2.64865	4.25257	15.4434	810.703	27.1021	38.6506	60.3854	51.5929	37.3061	64.9823	30.2082	9.58231	44.7929	0.792326	5.12687	2.31463	2223.77	2.31483	0.331915	400.759
D-11927	WCC	4	3	61.875	16.375	58.2701	169.375	45.125	61.75	196.625	49.625	19.5	971.5	2.88626	3.04554	14.823	836.272	27.8196	36.8205	55.9111	54.2816	34.6149	60.2903	29.7947	10.2576	41.0431	0.330053	1.30025	1.88047	879.892	2.16041	0.367605	337.044
D-11935	WCC	2	2	51.875	16.875	38.25	121.375	48.75	65.25	172.625	29.5	9.875	296.125	3.27498	3.50131	16.1165	819.061	27.3704	37.9083	56.6342	56.3517	35.3044	62.668	29.2572	10.0478	41.9794	0.567207	2.36937	2.95377	841.353	2.84653	0.331111	392.232
D-11936	WCC	4	3	71.0063	9.47563	37.5105	136.75	43.625	65.375	197.375	53.125	18.125	983.25	2.67944	4.00343	15.5907	810.823	27.3805	39.4505	60.1262	52.1181	36.1615	62.1693	30.0314	8.30426	45.0725	0.746549	2.49712	3.00243	1582.96	2.70787	0.342515	279.201
D-11943	WCC	2	2	55	20.7869	33.1104	123.375	42.25	59.25	156	47.25	11.75	572.375	2.93723	3.03071	14.5806	818.558	27.0105	37.6068	56.8016	54.6221	36.0261	62.1176	29.6669	10.178	42.5451	0.345853	2.39675	2.28251	1043.27	2.38874	0.32205	417.841
D-11953	WCC	3	2	54.75	20.5	37.1798	123.25	39.2095	55.2484	163.375	43.5	10.25	445.25	2.68511	3.57814	13.5156	820.104	26.4532	37.8619	58.8737	52.5729	37.5468	63.8568	30.1727	9.83319	43.542	0.467581	3.13075	1.91536	1640.06	2.00168	0.319292	420.12
D-11960	WCC	3	2	50.375	19.625	32.9109	113.125	38.5	54.625	155.125	42.125	9	381.375	3.11126	3.98404	15.8264	827.384	27.7469	37.9998	56.0398	54.1045	33.9649	61.0546	30.2117	10.0919	41.6073	0.593449	3.66962	2.20195	1687.3	2.24546	0.336131	364.978
D-11965	WCC	3	2	57.75	14	48.875	135	41.375	58	149.125	28.5	13	369.25	2.74273	3.34392	14.6227	828.659	27.7002	37.9059	56.693	56.0195	36.4188	63.2463	30.6501	9.91092	42.7329	0.566146	3.39437	1.79925	1889.7	1.9835	0.348243	400.031
D-11973	WCC	3	2	62	16	41.25	133.625	37.125	51.25	146.375	24.75	8.5	212.625	2.98957	4.19419	15.3364	812.867	27.1934	38.0574	57.3379	54.7896	36.1518	62.9793	30.1075	9.74607	42.9352	0.66323	3.8285	2.43306	1784.43	2.66204	0.332481	422.375
D-11980	WCC	2	1	49.625	18.125	20.25	102	45.25	62.5	137.625	26.75	8.625	229.875	2.84767	3.58405	15.6403	808.262	27.2324	39.158	59.9559	55.0456	36.8242	64.2251	30.2895	9.78036	44.7302	0.750963	4.82287	3.09144	1549.59	2.91367	0.320653	415.676
D-11985	WCC	3	2	63.125	12.25	42.625	132.375	42.125	56	145.5	22.375	12.25	278.625	2.96126	4.15297	14.0628	829.186	26.5323	37.5189	56.7957	52.6691	36.8189	62.9734	29.8713	10.0668	42.084	0.387271	2.19575	2.43194	1009.23	2.61592	0.296815	427.425
D-11986	WCC	3	3	71.0863	21.2485	52.9661	161.75	36.125	49.5	162.875	29	11.875	345.875	3.02678	4.29528	17.7768	796.768	27.0082	37.3711	56.7548	-	-	62.023	29.3265	-	40.7811	0.61937	2.97587	2.37193	1373.01	2.48519	0.331745	399.132
D-12014	WCC	2	1	48.2885	15.8557	26	103.25	49.5	68.625	149.625	32.5	7.625	249.5	2.93777	3.71461	15.8599	802.135	26.959	37.7981	58.0326	55.7579	36.9386	63.1789	29.4902	10.0344	42.9013	0.588034	3.69437	3.30719	1115.72	3.06121	0.334088	392.929
D-12020	WCC	3	1	52.125	13.0529	31.4167	114.75	42.5	57.75	149.875	45.25	10.5	496.75	2.65405	3.77639	14.9937	830.18	28.2739	39.9685	62.3131	55.8681	36.0886	64.543	31.5051	9.46393	46.3596	0.826093	5.47887	2.4162	2269.65	2.3991	0.368511	327.791
D-12021	WCC	4	3	57.375	17.125	49.9645	167	44.875	62.25	160	44.25	22.375	989.25	2.76524	1.98241	13.8257	860.078	29.8906	36.6345	54.3185	57.0625	32.227	58.8185	30.7768	10.3911	40.9916	0.130294	0.488125	1.48801	376.383	1.82913	0.336562	321.263
D-12027	WCC	3	2	55.875	22.875	46.875	139.875	38.25	51.75	146.375	34.25	8.125	282.75	2.82908	4.03356	16.5457	798.904	27.3834	38.3152	58.8133	53.8285	36.5278	63.8404	29.8034	9.43265	43.7403	0.694032	4.17675	2.40794	1755.2	2.61664	0.31821	416.036
D-12036	WCC	2	1	49.625	19.5	20	103	43.5	59.125	122.125	23.625	7.5	176.75	2.79461	3.35614	14.3299	824.755	27.2323	39.4601	59.29	56.1712	37.2684	64.5823	31.0233	10.084	44.6799	0.773841	5.42237	3.07642	1781.92	2.91878	0.31933	404.636
D-12037	WCC	3	1	44.2291	19.0905	35.75	113	41.5	58.5	126.625	40.125	8.625	354.625	3.02376	2.9735	13.6482	851.401	28.0341	38.8032	57.2088	56.1948	35.9837	63.8921	30.7096	10.375	42.7316	0.396548	2.708	2.41367	1068.43	2.44567	0.345198	423.055
D-12038	WCC	3	2	53.5	18.125	34.625	121.375	39.875	56	157.375	35.375	13	441.25	2.72009	3.43137	13.0071	826.893	27.568	38.2213	58.2476	51.2751	34.3012	61.7784	29.879	8.42359	43.4417	0.407443	2.71062	1.94992	1456.29	1.83041	0.386318	207.543
D-12040	WCC	2	1	42.8408	17.0653	19.625	93.125	47.375	68	133.75	44.75	9	406.375	2.60601	2.94761	14.7784	804.104	26.7946	38.3009	59.4959	54.2239	37.1181	63.5192	30.3599	9.79574	44.0925	0.865574	5.85937	3.83107	1529.33	3.31172	0.374258	423.997
D-12060	WCC	2	2	55.5	13.75	32.875	116.875	42	60.625	171.75	50	7.875	388	2.95676	3.99802	15.9562	807.265	27.2101	39.1086	58.6814	54.3985	36.3786	63.83	29.8272	9.93762	43.633	0.968465	5.97762	3.56723	1628.48	3.1739	0.341092	410.854
D-12074	WCC	4	3	64.625	13.125	59.2944	166.75	49.125	70.125	206.5	47.625	25.375	1213.75	2.95295	3.50945	15.2237	849.24	28.3596	39.3471	57.5857	57.1351	36.2759	64.0004	30.1456	11.0412	42.4827	0.401434	1.7155	2.30725	895.578	2.53749	0.341851	386.648
D-12079	WCC	3	3	67.125	23.3702	42.5977	159.375	38.875	56.125	179.75	30.25	9.625	274.25	2.99567	4.65765	15.7221	852.151	28.4722	40.4399	58.3117	54.7632	37.5823	66.8987	30.2494	10.0155	43.2558	0.428068	2.424	2.28028	1214.45	2.37628	0.329251	387.437
D-12081	WCC	4	3	79.75	17.4229	47.5671	155.25	41.625	58.25	177.625	28.5	20.375	611.25	2.98456	3.72037	14.9761	837.807	27.6936	38.6842	56.7906	57.1783	36.4301	63.2798	30.4231	10.3711	42.3193	0.519381	3.46637	2.67273	1285.92	2.75731	0.313458	392.83
D-12082	WCC	2	2	55	17	30	116.375	44.125	61.625	160.375	34.125	7.375	256.5	2.8546	3.7787	16.1011	807.531	27.2154	39.037	58.9904	54.7419	34.9918	64.7227	29.8455	9.83382	44.1269	0.827171	5.10375	3.42966	1563.73	3.22982	0.342094	401.058
D-12087	WCC	2	2	58.125	18.875	32.125	123.5	44.375	58.5	139.5	23.375	8.75	211.75	2.9875	3.59592	16.2633	820.897	27.6748	38.6469	58.0309	54.7114	37.4165	64.9815	29.6083	10.065	43.0256	0.499749	2.799	2.58789	1103.83	2.63309	0.369872	404.168
D-12114	WCC	3	1	50.875	15.875	25.75	107	41.5	58.375	137.375	36.375	9	326.375	2.92073	4.16729	14.9484	826.36	27.7493	38.5528	57.4247	54.6529	34.7306	62.8796	31.08	9.75369	43.2902	0.694747	4.6555	1.81541	2565.15	2.02149	0.31749	406.882
D-12119	WCC	3	2	53.75	15.75	33.375	117.75	37.25	49.125	138.375	37.5	10.625	398	2.68484	4.18462	15.0459	817.23	27.2338	39.0688	60.2764	52.8971	36.6821	65.1986	30.5015	9.94542	45.301	0.548828	3.65412	2.0728	1774.64	2.206	0.338336	414.349
D-12120	WCC	3	2	58.625	16.5	37.875	127.5	39.5	57.375	172.125	48.75	10.625	524.375	2.55194	4.12541	14.3606	815.93	27.2742	38.8105	60.8299	52.7416	36.6375	64.9353	30.9177	9.82557	45.677	0.67072	4.67387	1.77795	2624.43	1.9861	0.312994	406.025
D-12122	WCC	3	2	52.875	16.375	35.25	118.75	41.375	56.875	165.875	43	12.25	518.5	2.79356	3.66645	13.9768	838.908	27.7312	39.3855	58.6201	55.8343	35.9471	64.3568	31.438	10.1596	43.8144	0.56469	3.9765	1.87347	2100.48	1.89513	0.346319	385.968
D-12123	WCC	2	2	50.5	21.5	37	123.25	52.125	73	167.125	31.6204	9.29614	294.519	2.82167	3.65999	14.2382	819.408	27.1952	38.8626	58.0499	56.9361	36.4473	64.0349	30.7835	10.286	43.9717	0.708206	4.32012	3.05386	1621.47	2.98726	0.315015	366.983
D-12135	WCC	3	1	49.125	18.5	19.875	102.75	34.5	46.25	105.375	30.25	9	278	2.81923	3.28032	13.912	819.058	27.0098	37.8331	58.0736	54.7797	36.0489	62.3195	30.7228	9.93251	43.2311	0.705695	5.10762	2.30656	2186.53	2.38046	0.322131	428.415
D-12160	WCC	3	2	63.5597	12.8995	45.9584	127.375	45.75	64.125	164.375	52.5	10.25	517.625	2.95125	3.16715	14.5574	823.412	27.3428	38.9657	57.8904	56.6437	36.7443	64.5124	30.0659	10.236	43.5776	0.444963	2.77612	2.58169	1077.94	2.51301	0.345581	404.725
D-12162	WCC	3	2	58.375	16.375	31.4947	122	33.25	46.375	143.125	31.5	8.625	273.75	2.5555	4.28553	12.9289	832.158	26.9933	39.0525	61.1292	52.7071	37.2139	65.8469	31.7527	9.87622	45.7891	0.619819	4.80287	1.95545	2472.03	2.01905	0.353355	404.979
D-12166	WCC	3	1	52.75	18	27.375	112.75	39.875	55.125	137	42	8.75	372.875	2.44266	3.94162	13.9088	815.539	26.9138	38.784	60.8299	51.6749	37.7845	65.5139	31.3797	9.66323	45.9302	0.875245	6.28237	2.04615	3125.09	2.05292	0.308542	426.709
D-12167	WCC	3	2	50.375	18	38.625	121.25	38.375	57.125	158.25	47	11.75	551.125	2.97095	4.28411	15.0022	848.465	28.5838	39.5704	56.9566	53.6904	33.2055	64.1308	31.1396	10.1569	42.4975	0.498561	3.32387	1.65456	2072.64	1.84279	0.358044	378.532
D-12172	WCC	4	3	71.375	14.8715	68.9661	173.125	49.5	70.5	225	39.25	20.375	827.875	2.70067	4.27524	15.4715	850.93	28.8103	39.5787	58.1838	54.6423	36.0959	64.5797	30.9571	10.6158	43.3294	0.505533	3.29612	2.00166	1642.23	2.42718	0.294908	376.938
D-12175	WCC	3	2	59.875	15.125	38.125	127	36.5	51.5	157	40.375	9.125	367.25	2.62788	4.13348	13.6603	828.173	27.2782	39.6968	62.0481	53.1844	37.3112	66.784	31.3355	9.95531	46.5605	0.596571	3.82087	1.88067	2019.38	2.04674	0.348675	409.646
D-12176	WCC	2	2	53.875	14.9655	32.875	113.625	42.5	60	155.75	27.375	12.25	324.75	2.98834	3.61674	16.2479	821.669	27.5801	38.8982	58.2062	55.4107	36.6823	64.2903	29.8272	9.96368	43.3278	0.683438	3.72637	3.12058	1196.03	3.1021	0.330233	396.413
D-12177	WCC	2	2	55.125	20.125	43.375	133	43.625	58.75	158.375	34.625	7.25	254.625	2.68362	3.15266	14.3724	828.1	27.6071	39.5081	59.8601	56.2082	37.4658	65.4005	30.5625	10.0338	44.9835	0.54448	3.24225	3.11928	991.056	3.13813	0.342797	405.871
D-12179	WCC	2	2	53	18.75	35.125	121.25	46.75	62	171.5	35.375	11.375	394.875	3.0972	3.11441	14.826	835.422	27.8451	38.7623	57.8867	57.4613	35.6188	63.3536	30.1286	10.4401	42.9871	0.521637	3.40262	3.06363	1061.48	2.9518	0.331607	417.129
D-12181	WCC	3	2	56.375	19.625	50.1082	134.5	39	53.75	161.5	53.625	9.375	506.875	2.70877	3.34171	13.7783	813.609	26.4825	38.0685	59.1698	52.2003	37.7194	63.8	30.0599	9.84376	43.8207	0.51823	3.33162	1.69538	2146.07	1.85721	0.308573	422.941
D-12182	WCC	3	2	51.625	18.375	32.9681	115	41.375	59.5	157.75	41.75	9.125	379.625	2.7065	3.99125	13.5247	836.909	27.5583	39.8788	59.7302	54.7298	36.2923	61.4954	31.146	8.97833	44.5776	0.796991	5.88387	2.24138	2638.52	2.26535	0.309144	309.423
D-12183	WCC	3	3	56.5	16.9298	41.391	135.5	47.125	63.375	205	46.125	15.25	703.75	2.69889	3.5785	13.7525	846.506	27.9701	39.475	58.9467	55.9654	35.8607	63.9324	31.4772	10.305	43.5963	0.603248	2.8925	2.23854	1377.34	2.48279	0.315138	386.962
D-12184	WCC	3	1	47.1843	16.768	34.125	112.625	36.875	53	137	53.875	9.75	532	2.61427	3.86157	12.7362	858.804	28.3096	39.4592	61.2746	51.7603	35.131	63.3911	31.2102	8.29697	45.5527	0.774794	6.28275	2.15736	2892.41	2.06902	0.354339	180.196
D-12196	WCC	3	1	50.4594	17.3875	28.375	110.875	42.375	59.5	155.375	42	9.25	386.25	2.51691	3.80583	13.5526	821.298	26.7494	38.7999	60.6686	52.0833	38.1762	66.1171	31.1686	9.83475	45.5611	0.698225	5.13975	1.86351	2806.16	2.05181	0.308197	436.357
D-12201	WCC	3	1	52.875	13.875	35.25	116.125	42.25	60.5	153.875	48	9.75	475.375	2.58096	3.70435	13.6008	822.814	26.9275	39.2182	60.1443	54.0329	37.1096	65.2091	31.7018	9.65743	45.1166	0.858173	6.33475	2.24676	2842.8	2.23661	0.349075	426.815
D-12205	WCC	3	2	54.25	16.75	50.082	134.5	32.625	45.625	130.625	37.375	11.25	437.25	2.96895	4.43675	15.5195	842.587	28.3027	38.9635	59.2527	50.9134	34.8006	65.7186	30.1481	9.68076	43.7171	0.42066	2.39225	1.23888	1887.44	1.51175	0.380919	384.489
D-12208	WCC	3	1	46.625	20	22.75	104.25	45.125	65.875	138.875	36.125	8.5	312.5	2.63868	2.88787	13.3655	833.558	28.2395	38.9897	61.0149	54.0681	34.3552	62.5758	30.8388	8.58711	45.2662	0.713669	5.3445	2.69996	1994.87	2.30655	0.387063	185.94
D-12211	WCC	2	2	47.1219	18.1891	27.375	106.25	41.25	60.375	158.25	51.75	11.625	626.875	2.93097	3.2446	14.1704	830.262	27.4709	38.7526	56.9651	56.0133	35.8902	63.4862	30.7305	10.0415	43.2952	0.600749	4.23475	1.9416	2208.64	2.05038	0.327279	393.327
D-12214	WCC	2	2	56.2704	15.3709	40.9607	137.75	40.3971	56.6335	165.796	40.4081	13.1533	498.234	2.80969	3.35586	15.2527	834.141	27.9672	39.1747	59.2442	54.3433	36.3859	63.3363	30.0515	9.89966	43.3159	0.518644	2.9395	2.70603	1285.5	2.76703	0.322296	336.216
D-12220	WCC	3	1	48.8156	17.1683	16.125	94.625	44.875	63	145.75	49.25	8.375	407.875	2.47115	3.46054	15.4999	811.064	27.2224	37.8243	59.9698	52.5048	36.9196	63.2453	30.9691	9.60465	45.0947	0.852969	5.51712	2.24281	2475.97	2.08741	0.339506	295.135
D-12222	WCC	3	2	52.125	20.625	31.25	118.125	39.625	57	153.375	40.25	7.125	289.625	2.84734	4.04811	14.308	839.32	27.6354	39.2196	60.3202	53.3654	36.3284	65.9175	31.3181	9.99355	44.7623	0.57163	3.987	1.76862	2271.16	1.79512	0.385711	396.225
D-12225	WCC	3	2	57.25	17.75	40.5	129.75	38.25	52.125	146.375	45.375	10	456.875	2.8904	4.42352	14.3597	839.513	27.7194	38.8654	58.6024	53.4246	36.2685	65.0596	30.639	10.017	43.935	0.488461	3.4165	1.85438	1826.3	2.02097	0.333499	396.453
D-12229	WCC	2	1	49.625	15.875	16	95.875	47.75	66	142.375	23.5	8.125	191.625	2.77972	3.50326	14.7771	821.27	27.4	39.5076	59.9019	55.3904	36.6832	64.339	30.9937	9.98961	44.6005	0.766298	5.19262	3.55206	1492.03	3.1233	0.324463	405.042
D-12243	WCC	3	2	54.5	16	30.75	116	41.75	57	149.875	48.625	9.375	458.75	2.63916	3.76243	13.5484	820.169	26.5333	38.2335	60.3489	52.0165	37.902	64.9327	30.7654	9.72094	44.8525	0.681577	5.03337	1.85261	2722.38	1.98274	0.320362	422.715
D-12251	WCC	3	2	53.5	26	27.625	121.5	33.625	46.125	131.625	43.125	10	434	2.84334	3.63466	13.9591	826.964	27.0059	37.9634	57.0962	54.5875	36.3958	63.6243	30.4335	9.93567	42.5763	0.458443	2.848	1.92487	1669.18	2.03804	0.32496	424.314
D-12253	WCC	2	2	58.92	17.7286	39.5894	125.625	41	59.625	177.375	40.125	10.625	408.25	2.86068	3.85434	16.1901	811.218	27.3831	38.0572	57.4577	54.6627	36.3567	62.8984	30.0709	9.67459	43.2641	0.8501	4.5955	2.97888	1738.28	3.00523	0.317427	417.647
D-12256	WCC	3	2	55.0414	14.3395	34.625	123.5	41.75	58.625	175.875	51	8.125	412.625	2.77686	4.21977	13.3336	821.675	26.5264	38.1386	58.883	52.8222	36.9726	64.1829	30.9417	9.78381	44.2782	0.61244	4.62312	2.06936	2095.22	2.17395	0.320826	431.697
D-12258	WCC	3	1	53.75	14	34.125	115.875	38.75	54.625	144.25	39.625	7.75	310.25	2.46481	4.19397	14.2935	820.352	27.2901	38.9947	60.5916	51.2629	37.3398	65.5572	30.9431	9.68699	45.4463	0.743731	5.20387	1.96801	2678.58	1.9994	0.318719	428.48
D-12268	WCC	3	1	47.0075	16.732	38	114.5	42.375	58.625	131.5	42.125	7.125	307.625	2.78115	3.80669	14.6415	838.247	27.9485	38.8674	59.543	53.5356	34.6342	62.4203	30.7493	8.79046	44.094	0.567541	3.876	2.08762	1938.55	2.1847	0.330742	272.788
D-12279	WCC	1	4	47.0431	17.8194	15.5	91.875	43.375	63.5	123.375	24.125	9.5	232	2.62537	3.36372	13.6625	819.53	26.6192	38.6316	59.8222	57.603	38.677	63.3857	31.9105	10.0545	44.7775	0.997585	7.29662	2.82086	2581.67	2.88218	0.36655	413.934
D-12282	WCC	1	4	48.867	14.3536	17.875	93.5	45	64.5	134.875	27.625	7.875	215.25	2.58207	3.50909	12.3198	837.863	26.8707	38.563	58.5906	58.4115	37.597	63.4681	32.7631	10.2526	44.6974	1.08721	8.78787	2.76807	3173.33	2.52827	0.328781	376.054
D-12289	WCC	3	2	54.875	16.875	37.5	126	41.5	54.5	151.875	45.875	9.375	437.875	2.54599	4.10145	13.441	831.511	27.2214	39.4851	60.6483	52.8903	37.9663	66.55	31.3563	9.95418	45.5628	0.610942	4.578	2.10217	2211.71	2.14675	0.328762	419.199
D-12309	WCC	3	1	49.375	14.625	26	106.5	40.5	56.375	146.375	60.125	11.625	700.875	2.77006	4.31974	14.0556	828.616	26.7322	38.4068	58.9605	51.988	37.8762	64.9438	31.1232	9.81344	44.324	0.786971	5.61375	2.49506	2248.3	2.64397	0.326385	435.937
D-12320	WCC	3	1	49.5	18.875	21	104	41.5	56.25	150.875	42.75	10	428.5	2.43519	4.12445	15.2688	816.028	27.659	38.7858	60.7502	53.2622	36.9689	64.9634	30.8617	9.94222	45.4707	0.747019	4.89887	2.117	2319.88	2.15449	0.319453	378.817
D-12329	WCC	2	1	41.1742	15.232	20.875	91.625	47.25	66.375	118.75	34.375	9.375	325.375	3.03948	3.67015	15.2303	832.856	27.9108	39.4002	58.0869	55.9126	35.6542	64.3074	30.4779	9.99902	43.3724	0.652448	4.31962	3.51395	1237.72	3.06388	0.373247	410.198
D-12341	WCC	3	1	53.7098	12.6486	27.9004	104.625	32.375	44.875	121.375	31.25	6.25	204.25	2.70313	3.87918	14.9004	813.997	26.9611	38.7066	60.3903	52.288	37.1442	64.5287	30.4601	9.70218	44.6981	0.628458	4.1975	1.99891	2051.73	1.99165	0.321973	422.871
D-12345	WCC	3	2	55.75	17	51.625	138.625	38.75	53.125	160.375	52	9.25	483	2.84707	4.43244	15.2997	801.105	26.6419	38.2642	58.9592	50.9773	36.8098	64.1686	29.9029	9.53505	44.2727	0.68211	3.94925	2.29361	1697.95	2.37121	0.315901	416.105
D-12346	WCC	2	2	43.8005	14.5191	28.625	104.25	55.75	82	158.875	33	8.125	275.5	2.67448	2.69826	14.2462	818.325	27.07	38.1591	57.4266	54.1875	37.0512	63.2663	29.6266	10.1146	42.89	0.383278	2.21437	2.98345	708.797	3.07773	0.37904	423.175
D-12350	WCC	3	2	53.5	17.625	42.9325	129.875	41.625	58.5	152.25	42.125	9.875	408.125	2.80484	3.44755	13.6535	827.349	26.9842	38.472	59.0604	53.4602	37.1493	64.9588	30.3829	10.136	44.0532	0.48804	3.58437	2.19845	1577.61	2.22431	0.327051	417.866
D-12353	WCC	3	2	62.0629	20.3001	44.9608	142.875	35.4897	50.2905	160.375	42.625	12.375	517.5	2.8705	3.7116	14.1762	818.499	26.9266	38.2862	58.6761	54.4611	36.5586	63.504	30.2919	9.83553	43.6503	0.551047	3.9245	1.85851	2113.62	2.07841	0.320395	422.393
D-12354	WCC	3	2	53.625	17.5	34.375	119.75	42	58.125	165.25	40.25	7.625	321.125	2.54395	3.78143	14.8065	830.092	27.244	39.0902	60.8145	53.6595	39.3235	66.6223	30.6762	9.8608	44.7857	0.736794	4.86525	2.10344	2300.96	2.21368	0.328996	421.151
D-12357	WCC	2	2	52.875	16.25	32.75	116.125	45.125	62.25	161.375	33.375	10	340	2.80956	3.76945	14.7181	841.603	28.1007	40.0972	59.4372	55.2851	36.8028	65.9445	31.348	9.93206	44.82	0.774345	4.229	2.80012	1435.22	2.79087	0.357307	396.297
D-12359	WCC	3	2	48.625	22.25	34.125	119.25	43.25	58.5	150.625	46.625	11.75	476	2.60531	2.93092	12.9804	830.997	27.1395	39.224	61.4518	54.9072	37.2087	63.0261	30.8221	9.3903	45.4957	0.611503	3.8615	2.362	1556.56	2.30119	0.333764	297.216
D-12361	WCC	2	2	52.75	15.25	35.375	117.875	43.75	61.375	150.625	31.125	10.125	316.625	2.87427	4.02684	15.1692	831.192	27.8917	39.3638	58.5376	54.385	36.0915	64.7575	30.8591	9.67014	44.057	0.957276	5.66887	2.74215	2003.58	2.74908	0.334418	389.748
D-12362	WCC	3	2	55.6129	14.0224	32.8657	121.5	36.0637	52.0192	146.75	36	12.75	463	2.74836	3.92796	14.2269	822.775	27.0008	38.1057	57.99	52.1853	36.3592	63.1998	30.2813	10.0238	43.1223	0.489379	3.45037	1.76895	1950.27	1.95194	0.311881	422.436
D-12363	WCC	3	2	59.875	21.2155	35.9302	130.25	37.875	51.625	169.125	49.75	9.5	472.5	2.78918	3.71318	14.6855	817.778	27.6813	39.5361	61.0796	54.8982	35.0653	64.3084	31.2682	9.98422	45.5329	0.872667	5.98075	2.33321	2552.53	2.37227	0.320152	396.263
D-12387	WCC	3	1	50.125	18.875	30.625	114.125	33.875	47.5	110.5	42.875	7.625	350.25	2.70655	3.33627	12.5836	837.051	28.0359	39.5752	62.9653	52.2732	34.4606	64.7455	31.3608	8.45899	46.4806	0.638122	5.1025	1.75574	2949.04	1.75195	0.364254	171.294
D-12389	WCC	3	3	60.125	21.125	62.7847	163.75	45	62.375	183.75	29.875	12.25	361.875	2.76306	4.58285	15.1369	834.882	27.7804	39.1323	59.0686	50.9524	36.8281	64.7625	30.2498	9.81467	43.8284	0.469869	2.819	2.27207	1191.29	2.44559	0.299207	403.389
D-12393	WCC	3	1	53	16	22.1076	102.625	36.75	54.25	147.875	37.125	9.375	348	2.67031	3.71537	12.3974	822.69	27.4105	38.7681	63.5532	51.1099	32.7241	64.8267	31.5704	8.74119	46.3947	0.6798	3.78737	1.89343	2006.31	1.83239	0.353853	276.198
D-12395	WCC	2	1	44.3156	20.335	20.25	97.75	49.875	71.375	146.75	34.375	9.5	333.875	2.66672	2.47653	13.5321	825.141	26.9285	38.0612	58.75	55.2151	37.0943	62.814	30.2043	10.1741	42.9511	0.388522	2.96112	2.99839	1012.21	3.05908	0.377071	408.274
D-12397	WCC	2	1	52.0414	14.4823	29.125	109.375	43.25	59.75	138.625	29.625	10.875	326.25	2.77298	4.23818	15.2684	834.945	28.0411	40.0815	60.3547	53.4243	35.7565	65.4606	31.4293	9.49682	44.9828	0.905387	5.90775	2.86476	2066.51	2.8222	0.361209	373.249
D-12401	WCC	3	2	61.5	11.8161	43.9398	131.25	34.25	49.375	143.75	38.5	11.25	445.5	2.45496	4.42974	13.2042	838.795	27.5976	40.3965	61.6903	53.9131	37.5752	67.7839	31.9406	10.252	46.5342	0.630852	4.68175	2.01966	2345.39	2.01605	0.336085	402.976
D-12405	WCC	3	1	48.875	17	20.25	100.75	38.25	53.75	134.5	39	11.5	448.375	2.69686	4.39468	15.258	823.664	27.7282	38.9962	60.732	51.3935	35.4939	64.5827	31.1822	9.88339	45.2775	0.702754	4.611	2.1795	2085.88	2.11238	0.370168	353.068
D-12409	WCC	3	1	53.25	17	32.875	117.375	39.75	52.875	134.125	41.25	7.625	317.25	2.54968	4.28347	14.5643	821.123	27.3376	39.0226	60.8052	51.1543	37.2647	65.7752	30.8618	9.65145	45.2088	0.755027	5.1975	1.87679	2769.65	1.96367	0.321482	427.415
D-12411	WCC	3	1	51.375	21.5	28.375	115.375	38	53.875	133.125	34.375	8.5	294.75	2.55908	4.19976	14.328	840.607	27.6661	40.4201	60.1702	50.8878	37.6698	62.4528	30.1104	8.63635	44.0219	0.53209	3.40662	2.03293	1852.8	1.97636	0.352974	249.46
D-12413	WCC	3	2	52.125	16.375	34	117.25	42.25	57.75	158.875	39.625	10.125	414.25	2.55928	2.73745	13.4294	826.594	27.5353	38.8687	61.6052	55.7932	34.5648	63.1297	32.3568	9.76684	46.1199	0.80641	6.0505	1.89911	3240.75	2.00862	0.365636	323.307
D-12415	WCC	2	2	52.875	18.5	30.25	115.875	40.75	57.75	154.625	36.25	9	322.625	3.0007	3.09269	15.2606	817.533	27.2837	37.8976	56.7914	55.5843	36.3128	62.7999	29.6879	10.0655	42.6014	0.535568	3.49787	2.45495	1381.79	2.52588	0.320419	424.553
D-12416	WCC	3	2	58.375	19.875	31	123.125	35.375	48	150	36.5	9.125	334	2.62201	3.95176	13.5937	831.277	27.5637	39.2793	61.8001	53.1515	36.7169	65.8175	31.4601	9.96366	46.0688	0.646048	4.77112	1.86961	2501.41	1.9846	0.353125	392.282
D-12420	WCC	3	1	52.875	18.375	32.125	117.875	39.875	53.5	129.75	38.875	9.625	357.5	2.60541	4.18934	15.6388	825.963	27.1958	39.2834	60.4547	50.602	37.929	66.5015	30.9354	9.58773	45.4345	0.828673	5.3525	1.8554	2888.74	1.90728	0.334349	450.08
D-12424	WCC	3	1	49.5075	18.5653	22.625	102.75	34	50.5	146.125	42.625	12	485.375	2.90697	4.33685	14.9426	823.312	27.0794	37.6507	56.3824	51.92	36.5938	63.7859	29.1189	9.95812	42.293	0.463077	5.09625	2.11573	2381.68	2.06405	0.378313	284.266
D-12431	WCC	2	1	46.4028	15.7864	21	94	50.5	71.875	152.125	40.875	8.75	343.125	2.66824	3.57695	14.1239	822.106	27.1171	39.7786	61.4915	55.905	37.197	65.0619	31.9108	10.0036	46.3206	0.97657	6.05512	2.76633	2490.63	2.46899	0.353151	399.073
D-9973	WCC	2	2	51.125	26.5	36.25	128.375	44.125	61.5	160	31	9.625	299.375	2.93236	3.65502	16.9973	816.259	27.9042	38.8595	59.3583	55.6619	-	64.0414	29.81	-	43.6705	0.57549	2.69875	2.75803	920.694	2.7752	0.323937	394.807
D-9977	WCC	4	3	66.9955	9.36292	38.2547	141.25	43	61	187.75	30.875	24.75	732.625	2.7939	3.58097	14.3858	840.238	28.012	38.4206	56.092	56.0062	35.8919	62.8109	30.5318	10.3893	42.0071	0.438131	1.59687	2.17931	1319.28	2.43164	0.3276	385.816
D-9985	WCC	3	3	53.125	19	39.3237	140.5	41.875	60.375	185.625	49	13	626	3.24057	4.97087	15.9717	844.3	28.3439	38.5135	57.4655	54.2765	33.0887	62.1751	30.2098	9.74242	42.0838	0.668681	3.28087	2.30051	1367.27	2.47195	0.370241	334.435
D-9992	WCC	2	2	51.75	17.75	26.375	110.625	46.375	65.375	158.375	27.375	8.125	217.375	3.08541	4.15503	17.8195	808.158	27.1091	38.1515	57.9379	53.0367	35.7891	62.9497	29.053	9.4908	42.3634	0.626255	3.521	3.15819	1103.93	3.18879	0.34772	399.808
D-9994	WCC	2	1	53.375	13.625	26.75	108.5	45.375	64.25	160.75	30.625	7.125	224.875	2.87035	4.2428	16.1834	816.053	27.6094	38.6843	59.3279	53.2835	36.2626	63.5889	30.3011	9.60913	43.8167	0.935367	5.78725	3.38205	1713.11	3.28841	0.343578	391.725
D-9998	WCC	3	2	56.625	14.125	35.125	119	34.5	47.25	128	33	9.25	307.25	2.7168	3.09841	15.3492	828.142	27.7722	38.9887	59.5261	52.5663	36.1038	64.3865	29.803	9.80238	44.0631	0.309967	2.02962	2.07513	987.082	2.11718	0.34201	376.96
E-DK-4	WCC	1	4	45.326	13.0771	16.25	87.125	45.375	65.75	110.5	19.375	13.875	245.25	2.44263	3.32701	11.5988	847.535	27.0834	38.7573	59.0782	59.2442	36.8887	62.0592	33.7178	10.2107	44.0735	1.02586	8.826	2.75311	3229.28	2.56369	0.337412	326.473
EMBRAPA-Brazil	WCC	1	4	41.47	12.768	19.25	86.625	40.875	56	77.875	25.125	5.25	132.5	2.45244	3.97233	13.7893	830.247	27.0679	39.9643	60.5572	53.9795	37.9166	64.7667	31.8052	9.7073	45.0784	1.01808	7.47612	2.40411	3083.75	2.29343	0.332149	391.688
G-205	WCC	3	2	55.625	18.5	23.125	111.125	44.125	59	167.875	42.125	11	474.875	2.5348	3.77096	14.2647	812.972	26.9277	39.3375	61.8756	52.9164	37.8986	64.7897	31.3261	9.77166	46.5046	0.816265	5.03787	2.42756	2348.97	2.31145	0.355884	406.653
G-205-95	WCC	1	1	49.625	15.375	20.25	99.75	39.875	56	123.125	28.75	8	233.875	2.58601	3.48532	14.0485	812.819	26.8045	38.4729	60.1275	56.0062	38.2327	64.2043	31.6781	9.73242	45.0506	0.898058	5.71912	2.83734	1900.44	2.73104	0.38633	408.452
ICBA-Q3	WCC	1	4	42.067	16.9536	19.375	93	50.125	70.875	138.125	33.375	7.125	256.75	2.60199	3.45782	13.0387	844.277	27.2982	39.378	59.0723	57.9963	37.551	63.7966	32.4358	10.2556	43.802	1.04157	8.332	3.67442	2257.27	3.18154	0.335952	344.503
ICBA-Q5	WCC	1	4	43.4916	11.2512	19.125	88.25	47.875	67.75	115.375	25.625	8.5	211.875	2.40748	2.93064	12.6646	817.62	26.4924	38.0406	60.9272	57.7178	36.186	62.0071	33.2736	9.91652	45.7225	1.21439	9.58362	3.16221	3061.03	2.86689	0.377081	314.425
Indian Quinoa	WCC	1	4	44.6577	16.9477	15.875	90.75	45.625	62.75	127.375	25.75	6.625	171.125	2.5542	3.35278	11.6994	840.367	26.5009	39.2936	60.7347	58.0525	39.1803	64.4135	33.1386	10.6174	45.9708	1.0604	9.00337	3.17866	2829.92	2.90144	0.334449	377.36
Javi	WCC	1	4	48.6742	12.3986	16.875	90.375	39.875	59	123.5	24.875	11.625	268.75	2.52524	3.38205	13.4461	833.251	27.2157	39.5066	59.5287	58.2302	38.3592	64.5563	32.3682	10.4108	45.0184	1.15212	8.55937	3.30733	2582.31	3.05733	0.355263	390.546
Kamiri	WCC	3	2	49.125	18.5	32.25	113.5	42.25	61	162.125	38.875	10.375	397.25	2.62049	4.1621	15.8453	798.835	26.7147	38.2996	58.7842	51.4079	37.4087	64.0478	30.166	9.72646	44.2279	0.75513	4.24825	2.3344	1691.56	2.39243	0.314514	430.816
Kancolla	WCC	3	2	62.25	18.2201	26.9121	124.125	28.625	38.875	124.25	26.5	10.375	274.375	2.77739	3.40166	14.3994	835.717	27.4784	38.7516	58.4098	54.1055	36.6084	65.5479	30.2177	9.97518	43.4138	0.392928	2.60437	1.1618	2262.62	1.47572	0.352596	406.502
LP	WCC	3	2	48.25	25.875	39.25	127.625	44.75	63.875	159.25	41.125	10.75	449.625	3.02555	2.31609	14.6838	820.013	26.5507	37.5879	56.8266	54.0233	36.1823	62.4101	28.868	9.93236	41.6551	0.279188	1.324	2.7231	618.541	2.79982	0.34678	433.249
Moroccan Yellow	WCC	1	4	41.3725	10.31	19.375	84	44.25	61.25	94.25	24.25	8.375	177.125	2.24987	2.30556	11.6233	842.309	26.93	39.7053	63.3637	58.851	38.1414	65.3069	33.5663	10.4713	47.5195	1.09405	9.17537	3.14868	2923.01	2.69741	0.354974	329.175
Nde-09	WCC	1	4	46.267	14.7536	15.75	89.625	38.75	57.125	104.5	19	8.75	159	2.5175	3.04827	11.5583	841.203	26.5966	38.6207	60.6679	59.5741	38.0782	63.002	33.7705	10.6406	45.8144	1.01804	8.76062	3.13768	2799.46	2.75948	0.366764	352.027
NL-6	WCC	1	4	39.9017	13.8831	20	87.875	38.375	55	83	22.125	6.625	146	2.55635	4.15499	13.7396	830.372	27.2064	38.9923	59.2143	54.8843	36.7622	63.4954	32.1132	9.61775	44.0912	1.19392	8.69125	3.00382	2909.84	2.73829	0.348925	374.849
NSL-86628	WCC	1	4	47.8971	16.2985	13.875	90.125	42.125	61.75	123.25	21	12.625	257.875	2.67331	3.90077	14.2646	824.503	27.0285	38.5499	57.8043	56.3726	37.0748	62.3649	31.9551	10.1139	43.5764	1.00523	7.00512	2.68189	2611.29	2.52213	0.34697	377.322
NSL-86649	WCC	1	4	45.3408	13.3986	17.75	90.5	37.75	59.125	111.5	22.25	15.5	318	2.52498	4.39265	15.1809	834.272	28.2012	40.1332	60.1446	52.0895	34.6201	63.8758	31.8364	9.07228	44.9119	1.03848	7.20975	1.7863	4036.68	1.84314	0.383274	366.904
NSL-91567	WCC	1	4	45.75	12.125	17.375	92.125	43.625	64.125	110.125	33.125	6.75	223.875	2.48343	3.38729	12.8754	838.836	27.2411	39.8747	60.5298	57.0201	37.9559	64.9421	32.7778	10.2343	45.6431	1.09797	8.58825	3.41378	2488.93	2.96913	0.339929	363.263
NSL-92331	WCC	1	4	44.567	15.7915	17.5	94.625	42	59.375	113	22	14.375	312.25	2.51589	4.35922	15.0213	839.36	28.436	40.4024	59.7172	52.4185	35.1815	64.638	31.7644	9.338	44.75	0.991212	6.64212	1.87165	3562.59	1.96379	0.388022	366.936
Ollague	WCC	2	2	47.7451	19.3875	22.4512	114.75	40.8885	60.7464	139.625	26.3599	7.5832	204.593	2.65103	2.53908	15.6124	803.038	26.695	37.8462	56.9451	53.7094	37.2827	62.6904	29.3296	9.86111	42.6101	0.566637	2.99762	3.60551	961.943	3.37246	0.41783	425.841
Oro-de-Valle	WCC	1	4	43.735	13.8831	17.875	88.25	44.25	64.75	120.125	26.375	8.375	222.375	2.53847	2.61525	12.5382	826.406	26.6129	38.361	60.6403	59.1588	38.2501	62.2983	33.0361	10.2143	45.727	1.23976	9.87137	3.7383	2784.57	3.17593	0.35394	349.898
Pasankalla	WCC	3	2	54.47	8.91089	46.5214	124	42.125	59	166	43.75	12.5	544.625	2.4938	6.10047	14.1381	878.893	29.2076	41.5621	61.7897	52.1358	38.1567	66.0664	31.6056	9.30255	46.2936	0.60939	3.829	2.34937	1554.49	2.53348	0.280071	272.05
PI-478408	WCC	2	1	47.25	19.125	24.75	105.375	44	64.75	136.5	46.5	8.625	394.125	2.77156	3.29391	14.0214	880.783	29.6387	40.4697	57.51	58.0386	36.7554	67.3893	30.9367	11.8366	43.3282	0.318467	2.27362	3.47292	645.591	3.14551	0.422219	350.93
PI-478414	WCC	3	2	47.25	20.25	33.625	115.875	43.875	63.5	157.125	49.5	7.875	380.5	2.88192	2.21196	12.3016	792.775	25.9286	37.0299	58.1961	49.4671	35.2843	59.6798	29.2853	7.79465	42.9309	0.758655	5.0045	2.29581	2257.9	1.88226	0.400857	131.043
PI-478418	WCC	3	2	61.5	17.75	23.625	117	37.875	53.625	163.875	33.25	10.25	340.375	2.91874	3.26228	13.6938	828.621	28.7617	41.2882	63.5694	56.4507	30.8801	64.8605	33.7592	9.47565	47.101	0.782352	4.35087	1.17027	3644.09	1.37328	0.414453	262.402
PI-510532	WCC	3	3	73.625	14.5304	46.5034	151.875	41.125	53.5	151	24.75	12.875	316.875	2.58404	4.58666	16.228	856.344	29.75	39.849	57.1999	53.9049	34.5792	64.8341	30.9389	9.91851	42.4639	0.548503	3.2645	1.65215	1970.84	1.9977	0.325013	344.494
PI-510533	WCC	3	3	65.75	23	42.9739	147.25	41.75	55.875	164.5	31.875	14.5	484.375	2.68442	4.46893	15.2643	856.501	29.4283	39.8194	56.7058	55.2087	35.0477	64.8161	31.0669	10.4098	42.8393	0.52221	2.93037	1.72954	1640.19	2.04731	0.303285	346.036
PI-510537	WCC	3	2	49.6129	14.3395	37.5	115.25	41	58.125	161.25	49.375	9.25	462	2.55392	3.41362	12.8111	853.946	28.7465	40.61	62.055	53.1059	35.4632	63.5403	31.0261	8.54612	46.0342	0.420913	2.65162	2.01887	1388.72	1.88457	0.326007	201.192
PI-510540	WCC	3	1	47.625	20.375	27	109.625	36.375	54.125	114.625	28.625	6.5	186.25	2.94079	2.60817	14.5712	825.044	27.0395	36.7494	55.1022	55.1858	35.5028	61.4753	29.3542	10.1913	40.7858	0.297508	1.91562	2.15828	871.957	2.31154	0.362448	446.601
PI-510543	WCC	3	1	52.125	16.25	20.125	102.75	44.875	59.875	147.5	33.875	8.25	280.125	2.56526	3.39566	14.8737	797.624	26.3454	37.4829	60.9393	52.1597	37.1075	63.0634	30.637	9.44499	45.2329	0.801977	5.42112	1.96147	2788.88	1.93478	0.341579	348.609
PI-510545	WCC	3	2	50.375	16.125	36.125	116.75	43.25	62.625	172.25	50.375	10.625	536.25	2.64958	3.77457	14.2301	828.887	27.1764	38.7354	59.8189	52.7043	37.6944	65.765	30.7627	9.78311	44.7088	0.709404	4.91587	2.14672	2392.32	2.26129	0.31845	426.217
PI-510546	WCC	3	2	51.75	20.875	30.875	117.875	41.25	54.75	148.75	51.125	7.875	409.625	2.73455	3.76563	14.1801	823.874	27.2692	38.7974	57.8056	54.304	36.5926	64.2734	31.3651	9.7461	43.8481	0.705541	4.92662	2.4713	1986.76	2.44599	0.316317	428.977
PI-510549	WCC	3	1	42.0863	18.9477	18.125	96.625	37.25	52.625	121.875	41.375	7.875	324.5	2.72803	3.79301	12.6658	814.172	27.1999	38.3902	61.3317	50.6559	33.0948	63.0672	30.8789	8.52864	44.9959	0.689278	5.42262	2.1048	2903.94	2.01404	0.328148	209.663
PI-510551	WCC	3	1	48	14	23.125	102.75	42.5	57.875	156	55.875	9.625	544	2.74627	4.27555	16.2811	794.002	26.4604	38.2307	59.4729	51.3246	36.2444	64.448	29.7196	9.43761	44.3086	0.739152	4.8315	2.31209	2045.33	2.32677	0.325963	437.46
PI-584524	WCC	1	1	50.9202	19.394	17.25	100.75	44.375	64.625	157.625	32.5	7.875	249.875	2.58084	3.7621	12.6058	844.698	27.2139	39.1271	60.1589	56.7058	37.8333	63.8797	32.6682	10.2202	45.0773	1.05738	8.36487	2.66321	3132.21	2.61556	0.316964	380.68
PI-587173	WCC	2	2	58.125	17.625	35.6401	126	43	57.75	168.75	39.75	7.375	297.125	2.98588	3.70216	14.6982	839.442	27.8895	38.9426	57.3844	56.6046	36.1272	64.271	30.5307	10.4587	43.155	0.521799	3.34175	2.82837	1160.93	2.76248	0.330901	398.758
PI-596498	WCC	3	2	54.5	19	27.4883	116.5	42.625	54.875	164.25	53	10	516.625	2.63901	4.18748	13.4753	827.965	26.6822	39.4262	61.4418	52.2248	38.0896	66.661	31.4032	9.82949	46.1603	0.580754	4.30925	2.19179	1966.63	2.26285	0.322667	424.71
PI-614880	WCC	1	4	54	15	18.25	101.5	41.375	55.875	127.75	26.375	9.125	244.625	2.34672	4.38477	13.175	842.906	28.106	40.7168	63.4917	54.0269	36.8107	64.1116	32.3558	9.15028	47.2502	0.959351	7.28425	1.93374	3788.33	1.96901	0.368786	299.903
PI-614881	WCC	2	2	50	18.125	29.75	112.5	49.5	68.125	177.75	50.125	9.75	494.875	2.96109	3.74802	14.0344	833.138	27.7425	39.4344	58.648	56.4002	35.021	63.7441	31.3842	10.2245	43.9154	0.72568	5.15362	2.5616	2008.21	2.59274	0.356784	395.494
PI-614882	WCC	1	1	53.625	17.125	15.75	100.75	42	58.25	154	21.5	9.125	183.875	2.66263	3.95873	14.607	830.407	27.5563	39.39	59.0528	56.3933	36.1841	63.2789	31.8689	9.89567	44.58	0.815958	5.58225	2.341	2393.64	2.35529	0.375013	364.856
PI-614883	WCC	1	4	44.2028	18.3864	17.875	90.25	40.5	56.5	119.125	20.5	14.25	277.875	2.54033	4.39123	14.7673	840.815	28.1951	40.1379	59.6849	52.4119	35.6532	64.4599	31.734	9.13564	44.2463	1.07439	7.31187	1.93708	3786.49	1.98274	0.372058	367.671
PI-614884	WCC	2	1	40.9823	16.835	19.5	91.5	43.375	64.5	106	28.875	6.125	177	2.4627	3.53111	15.8005	811.948	27.6938	38.6679	59.1172	54.0285	36.8602	64.8849	30.0494	9.8852	44.0145	0.789299	4.99237	3.7599	1338.74	3.34135	0.402615	423.308
PI-614885	WCC	1	4	49.3271	13.768	16.875	93.625	42.75	63	134.5	24.75	6.25	155.875	2.52157	3.20023	11.2719	841.942	26.4107	38.6335	59.7625	60.3012	38.1191	63.4033	33.419	10.5195	44.8749	0.868816	7.70075	2.86194	2713.6	2.51992	0.339849	383.518
PI-614887	WCC	1	4	50.2059	11.2512	20.875	92.25	39.5	60.875	126.5	21.875	8.5	185.875	2.53897	3.64633	13.3627	841.4	27.3364	39.6905	60.1213	56.9825	37.6221	64.12	32.767	9.98231	45.3749	1.02992	7.59037	2.819	2683.92	2.63252	0.378076	384.06
PI-614888	WCC	1	1	44.4916	16.6797	20.25	95	47.25	66.25	138.625	29.375	13.125	372.375	2.4038	4.31202	14.3451	842.728	28.1558	39.9543	60.5988	53.3544	35.8277	64.7782	32.2927	9.84857	45.1277	1.00282	6.98812	1.97638	3550.51	2.11548	0.37923	379.825
PI-614889	WCC	1	4	46.326	10.4696	21.25	87.375	48.5	70	105.625	21.5	10.5	224.375	2.41664	2.76804	12.0799	827.017	26.6724	38.4872	61.8267	59.727	36.6974	63.1586	33.9849	10.2863	46.3761	1.23396	10.158	3.1445	3238.61	2.64843	0.388189	316.889
PI-614914	WCC	3	2	50.7557	16.768	33.125	115.75	41.375	61	141.125	37.5	10.125	383.875	3.08052	2.42302	14.6231	833.181	27.4756	37.5972	57.2251	55.9175	36.1067	63.0083	29.3872	10.3673	41.9613	0.294652	2.00837	2.80836	695.46	2.79111	0.365376	428.131
PI-614915	WCC	2	1	39.0028	21.3864	26.375	97.375	47.25	69	127.75	40.875	8.25	338.625	2.88541	3.28226	14.563	820.911	27.1935	38.8729	59.0535	56.9657	36.876	64.2287	30.5513	10.1859	44.0722	0.496302	3.60325	3.07193	1218	2.8104	0.367745	413.562
PI-614919	WCC	2	1	44.6129	24.3395	28.5	111.75	43.875	62.625	120.625	33	8.875	301.125	2.74893	3.18236	12.7491	828.873	26.7074	38.693	59.1793	57.1974	37.7717	64.3779	31.446	10.1924	44.286	0.636003	5.05025	3.36461	1463.99	3.20514	0.335864	437.939
PI-614920	WCC	2	1	43.5148	16.6619	20.125	93.625	49.5	70.625	142.5	39.125	7.125	291	2.85654	3.04291	14.4788	821.35	27.2178	39.5375	60.3535	58.4986	37.9822	65.8791	30.5688	10.1743	44.7788	0.602049	4.19887	3.80212	1174.69	3.47029	0.393202	436.564
PI-614927	WCC	1	4	48.867	10.3536	16.125	88.875	40.875	61.75	112.125	26.125	5.25	138.875	2.68339	3.55381	12.4552	829.386	26.8823	38.9871	58.6032	59.0348	36.4552	62.6013	32.6443	10.1034	44.0195	1.07012	7.892	3.34677	2321.01	3.09552	0.352659	372.829
PI-614929	WCC	2	2	43.9823	26.1683	28.5	109.75	47.375	71.375	170	35.875	7.125	263.5	2.78139	3.31215	15.7247	802.757	26.7112	38.6935	59.2205	53.0613	37.4249	64.3871	29.6917	9.93241	44.1862	0.493779	3.09875	2.71029	1166.53	2.60013	0.365834	402.302
PI-614934	WCC	3	2	50.75	21.75	39.625	126.75	40.375	61.25	147.75	37.5	11.875	443.875	2.85097	2.74163	13.7597	853.011	28.369	39.4415	57.691	58.6363	36.0229	65.2988	30.7703	10.6486	43.2231	0.359209	2.21025	2.00686	1086.57	2.09316	0.363475	405.895
PI-634917	WCC	1	4	49.5075	13.232	16	91.625	41.25	59.75	123.5	20.625	7	144	2.54881	3.3903	12.3116	848.602	27.3319	40.0147	61.3018	57.9794	38.4685	65.2691	32.8055	10.3876	45.9318	1.03657	8.44975	3.36091	2553.74	2.92059	0.375729	374.635
PI-634918	WCC	1	4	39.7885	12.8557	20.25	89.375	40.25	56.125	101	28	5.75	161.75	2.65647	3.02314	12.8685	842.644	27.177	38.6558	60.2999	57.248	36.355	62.818	32.9142	10.1615	45.6135	1.0872	8.44362	2.96179	2852.12	2.49637	0.354428	359.091
PI-634919	WCC	1	4	49.6129	14.6252	16.625	93.5	42.875	63	136.375	27.25	7.125	192.75	2.5245	3.68659	12.4693	841.367	27.1926	39.2304	59.9221	58.9361	36.7341	63.1063	33.1289	10.3468	44.8156	0.929149	7.65875	2.51483	2979.2	2.34009	0.331433	365.952
PI-634920	WCC	1	1	54.875	15	17.75	101.625	41.375	58	150	25.375	7.5	190	2.5475	3.84249	13.2361	837.241	27.1566	39.3861	60.2682	55.8946	37.7039	63.9287	32.6775	10.2255	45.6504	1.01503	7.78275	2.50072	3111.38	2.37158	0.348968	376.246
PI-634921	WCC	1	4	43.2885	15.6891	17.125	89.125	44.75	65.375	118.25	24	7.125	170.5	2.60823	3.49648	12.6906	828.762	26.6068	38.6053	59.1007	57.6546	37.5376	62.911	32.7517	9.95956	44.388	1.20167	9.51487	3.3561	2832	3.03452	0.358064	364.598
PI-634923	WCC	1	4	42.6345	11.5369	18.625	87.375	38.625	59.25	104.875	21.25	11.25	226.875	2.57622	3.75719	12.7419	815.9	26.5599	38.8085	60.1787	56.8074	37.2357	63.3229	32.4693	9.98969	45.1998	1.3579	10.6451	3.41035	3099.61	3.14979	0.377267	373.681
PI-634924	WCC	1	1	58	11.75	13.125	97.25	35.125	51.25	137.625	21.5	7.75	167.5	2.76419	4.26521	13.6886	856.789	28.4125	40.3006	59.4828	59.4326	36.1789	65.3549	32.4849	10.6704	44.8057	0.763091	5.58125	2.14238	2600.37	2.17638	0.360597	349.661
PI-634925	WCC	1	4	45.7773	14.5369	16	89.375	45.625	65.625	124.5	20.625	10.25	194.375	2.57254	4.1101	13.0906	824.903	27.0126	38.7577	61.1737	54.7602	37.3736	62.3207	32.4346	8.8091	45.4629	1.17962	9.0465	3.20876	2850.68	2.59821	0.387845	290.442
PI-665272	WCC	3	2	55.25	17.5	39.2389	127.625	42.875	63.625	172.5	35.125	11.75	402.125	2.8672	4.54721	13.1119	840.377	26.8415	37.5763	57.7102	51.5202	36.8292	62.9597	30.9366	9.67032	42.707	0.621797	4.80662	2.20902	2128.79	2.41107	0.319371	445.429
PI-665276	WCC	3	1	41.372	14.0905	19.625	88.75	39.875	59.875	141.125	48.375	8.375	422.875	2.57753	3.85912	14.5964	845.476	29.7776	41.6385	62.9387	54.5434	31.5121	65.8149	32.7807	9.39446	47.1224	0.518502	3.818	1.34332	2899.67	1.41856	0.430965	252.307
PI-665277	WCC	3	3	53.25	21.1083	51.8752	141.125	50.125	72.25	172.625	35.375	13.625	486.25	2.75259	2.77244	14.0335	830.894	27.4947	38.3374	57.655	57.3532	36.532	63.9474	30.1087	10.4704	42.8588	0.303883	1.92587	2.49534	887.705	2.53522	0.370385	394.811
PI-665283	WCC	1	4	50.47	13.4823	17.625	95.75	40.375	57.75	129.125	24.25	10.25	245.625	2.65332	3.78252	13.0681	832.232	27.0252	38.4885	58.6089	56.9315	37.055	62.5901	32.3343	10.2363	44.0836	1.1165	8.51075	3.13905	2688.24	2.84562	0.344741	365.222
PI-674266	WCC	4	3	76.6129	15.0537	44.2845	154	45	62.875	182.5	30.625	23.5	770.75	2.82825	4.25334	15.7125	828.646	28.106	38.6906	58.2743	53.951	34.5447	63.0602	30.9856	9.91838	43.5474	0.654592	4.17775	1.90701	2197.8	1.97754	0.346818	363.602
PUC-mix-green	WCC	1	4	50.0863	12.3762	15.625	91.875	36	51.875	113.875	25.375	6.25	160.875	2.7037	3.89178	12.7313	826.719	26.4542	38.4881	58.1066	57.2944	36.1044	62.1441	32.3959	9.54081	43.5293	0.995066	7.79662	3.17463	2469.94	2.88864	0.351418	359.87
PUC-mix-red	WCC	1	4	49.3156	12.335	19.125	100.25	43.375	63	128	23.25	10.625	243.375	2.611	3.90983	14.3181	824.183	27.1794	39.4774	59.8294	55.9146	37	63.8083	31.8835	9.59149	44.9466	1.03055	7.18937	2.80867	2565.57	2.65245	0.38971	369.713
Ratuqui	WCC	2	2	50.5	14	26.75	105.375	48.375	71.75	165	34.25	9.375	318.375	2.55747	2.84393	15.9642	793.788	26.4951	38.2815	58.5646	51.2329	37.2565	63.2309	29.5091	9.64396	43.5205	0.641094	4.01125	3.23474	1202.75	3.14485	0.392384	424.412
Real	WCC	2	1	44.6345	15.8226	22.5	96.625	42.9182	60.862	125.375	29.125	7	211.5	2.70416	2.53079	17.6432	789.681	26.9878	37.2786	58.0937	52.8483	35.6546	60.9434	28.9384	10.1606	42.2923	0.498433	2.8315	3.59334	776.991	3.39153	0.428863	406.121
Redhead	WCC	1	4	45.8156	14.835	16.125	91.5	48	68.875	127.875	23.75	7.625	181.75	2.60267	3.13164	11.6454	831.982	26.2646	37.642	58.2984	60.9762	37.8559	62.0715	33.2077	10.8524	43.9737	1.04815	9.00737	3.47147	2609.82	2.984	0.323647	384.453
REDHEAD	WCC	1	4	43.1742	14.8986	17.875	88.375	45.6724	67.043	122	23.875	6.375	151.75	2.62026	3.40365	12.4099	835.432	26.701	38.3563	59.6862	59.1605	37.6342	62.2941	32.4662	10.4766	44.1558	1.16728	9.42462	3.60989	2622.05	3.07242	0.330947	355.377
Regalona	WCC	1	4	43.067	10.1536	20.5	88.125	45.25	63.375	106.125	20	12.125	227.25	2.67758	3.75541	13.3101	831.868	26.7447	38.3583	58.3384	55.5216	35.9908	61.986	32.259	9.71368	43.5546	1.29149	9.618	3.08536	3157.38	2.73401	0.359473	370.983
RU-2	WCC	1	4	41.9725	12.31	19.5	86.875	45.875	64.375	89.625	29	6.25	182	2.44829	3.58693	12.5741	855.624	27.7295	39.7836	61.4748	57.3855	38.4361	65.1559	33.3704	10.4318	46.4174	0.951715	7.66	2.35669	3257.21	2.35887	0.355189	369.417
RU-5	WCC	1	4	46.6219	13.3557	15.375	87.875	41.25	57.375	97.75	23.25	7.625	177.875	2.4798	3.54252	12.2095	853.625	27.5744	38.7457	59.0564	59.3709	36.9425	63.2053	33.3849	10.5171	44.3452	0.955472	8.05	2.54481	3168.44	2.40312	0.358612	340.602
Salcedo-Inia	WCC	2	1	46.25	19.875	19.875	101.5	50.75	69.875	137.25	31.25	7	220.75	2.53369	3.53768	14.2217	808.473	26.6182	38.4083	60.8727	53.0259	37.8082	64.8675	30.3877	9.85723	44.8257	0.592453	4.18562	2.68799	1552.69	2.62903	0.323505	432.403
Titicaca	WCC	1	4	37.4017	9.3831	22.125	84.25	44.875	65	86.625	26	5.75	147.625	2.5318	3.53987	12.8283	829.691	27.0196	38.3822	59.2939	56.2219	36.9152	62.9246	32.3229	9.75585	44.5871	1.25976	9.72637	3.59241	2712.35	3.29201	0.344267	351.387
TITICACA	WCC	1	4	39.0863	8.94766	20.875	83.75	45.125	65.25	94	27	5.5	148.875	2.548	3.11059	11.5794	838.401	26.2518	38.5643	60.0425	58.6189	38.0512	62.4637	33.0509	10.0902	44.9178	1.00617	8.69062	3.36073	2607	3.07552	0.339738	365.067
Vikinga	WCC	1	4	40.867	13.1536	20.25	86.5	45.25	66.375	84.625	26.5	4.375	115.5	2.47576	4.01733	13.257	841.455	27.3563	38.7862	61.4863	52.3535	37.3352	64.1987	32.8399	9.93474	46.2125	1.2753	9.61337	3.02978	3192.71	0.367856	337.952	-
