# Supplementary material for: A comprehensive characterization of agronomic and end-use quality phenotypes across a quinoa world core collection
Source: Frontiers journal article supplement (doi:10.3389/fpls.2023.1101547), 2023-02-16
Supplement: Presentation_2.zip [file Presentation_2.zip]

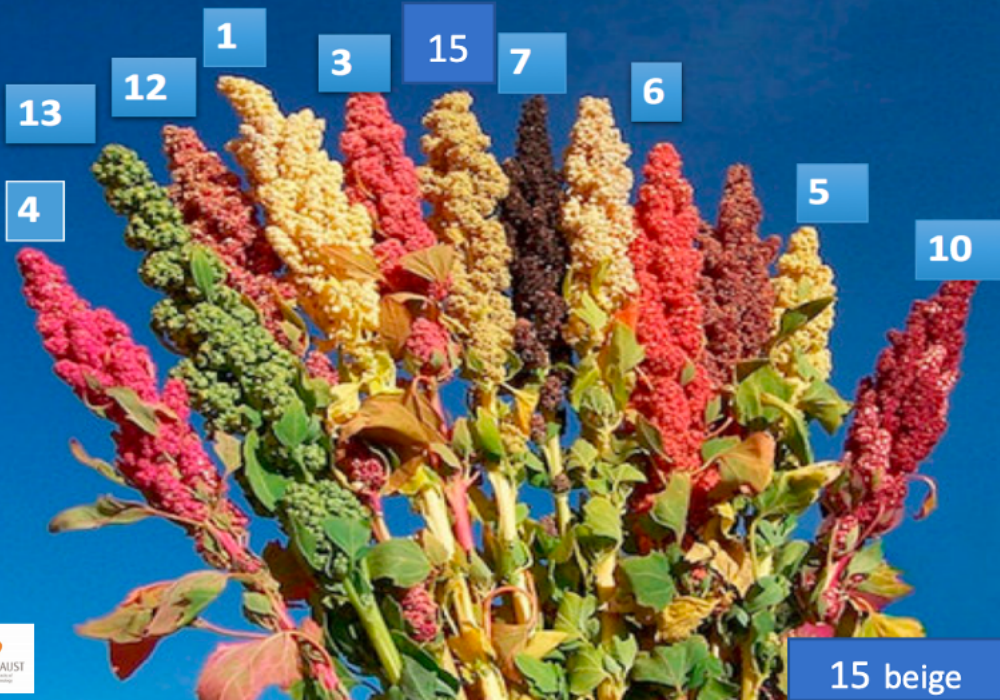

***Panicle color  
at  
physiological  
maturity***

- 1-White
- 2-Purple
- 3-Red
- 4-Pink
- 5-Yellow
- 6-Orange
- 7-Brown
- 8-Grey
- 9-Black
- 10-Red and white
- 11-Red and pink
- 12-Red and yellow
- 13-Green
- 14-Red and green

15 beige
